# Supplementary material for: N-Cyano sulfilimine functional group as a nonclassical amide bond bioisostere in the design of a potent analogue to anthranilic diamide insecticide
Source: Royal Society of Chemistry journal article supplement (doi:10.1039/d2ra06988a), 2023-01-01

# *N*-Cyano Sulfilimine Functional Group as a Nonclassical Amide Bond Bioisostere in the Design of a Potent Analogue to Anthranilic Diamide Insecticide

On-Yu Kang<sup>a,b</sup>, Eunsil Kim<sup>a,c</sup>, Won Hyung Lee<sup>e</sup>, Do Hyun Ryu<sup>b,\*</sup>, Hwan Jung Lim<sup>a,d,\*</sup>, Seong Jun Park<sup>a,d,\*</sup>

<sup>a</sup> *Data Convergence Drug Research Center, Korea Research Institute of Chemical Technology, Daejeon 34114, Republic of Korea*

<sup>b</sup> *Department of Chemistry, Sungkyunkwan University, 2066 Seobu-ro, Suwon 16419, Republic of Korea*

<sup>c</sup> *Department of Chemistry, Sogang University, 35 Baekbeom-ro, Seoul 04107, Republic of Korea*

<sup>d</sup> *Department of Medicinal Chemistry and Pharmacology, University of Science & Technology, 217 Gajeong-ro, Daejeon 34113, Republic of Korea*

<sup>e</sup> *Central Research Institute, Kyung Nong Co. Ltd., 34-14 Summeori-gil, Kyongju 38175, Kyongsangbuk-do, Republic of Korea*

Email: [sjunpark@kriect.re.kr](mailto:sjunpark@kriect.re.kr)

## Supporting information

|                                                                   |     |
|-------------------------------------------------------------------|-----|
| General methods and synthetic procedure .....                     | S1  |
| <sup>1</sup> H and <sup>13</sup> C NMR spectra of compounds ..... | S7  |
| IR spectrum of organosulfur compounds .....                       | S12 |
| Physicochemical properties organosulfur compounds.....            | S15 |
| Larvicidal activity against Spodoptera.....                       | S16 |
| Open field test .....                                             | S19 |
| pH-metric pKa, Log P of compounds .....                           | S23 |

## General methods

Analytical thin layer chromatography (TLC) was performed on Kieselgel 60 F<sub>254</sub> glass plates precoated with a 0.2 mm thickness of silica gel. The TLC plates were visualized by shortwave (254 nm). Flash chromatography was carried out with Kieselgel 60 (230–400 mesh) silica gel. Melting points: Barnstead / Electrothermal 9300, measurements were performed in open glass capillaries without corrections. NMR spectra: Bruker AV 300MHz (<sup>1</sup>H–NMR: 300 MHz, <sup>13</sup>C–NMR: 75 MHz), AV 500MHz (<sup>1</sup>H–NMR: 500 MHz, <sup>13</sup>C–NMR: 125 MHz), AV2 500MHz (<sup>19</sup>F–NMR: 470 MHz), the spectra were recorded in CDCl<sub>3</sub>, MeOD and DMSO-*d*<sub>6</sub> using TMS as internal standard and are reported in ppm. <sup>1</sup>H NMR data are reported as: (s = singlet, d = doublet, t = triplet, q = quartet, br = broad singlet, quin = quintet, m = multiplet; coupling constant(s) in Hz; integration, proton assignment). IR spectra were recorded using a Bruker FT/IR-300E spectrometer. High resolution mass spectra (HRMS): JEOL JMS-700. All solvents were purified using column filter solvent purification system before use unless otherwise indicated. Reagents were purchased and used without further purification.

## Synthetic procedure for synthesis of compound 6

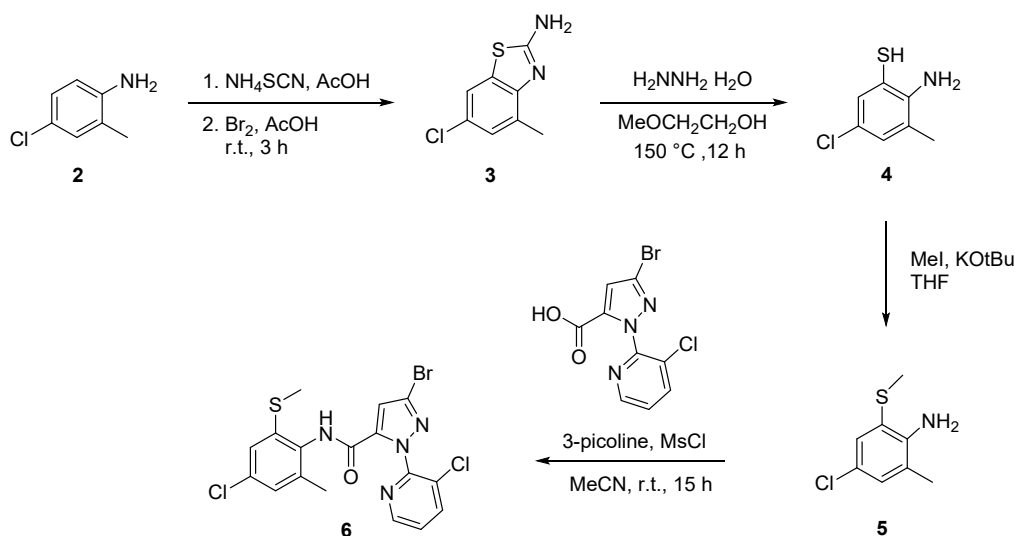

### Step 1. Synthesis of 6-chloro-4-methylbenzo[d]thiazol-2-amine (3)

4-Chloro-2-methylaniline **2** (50 g, 0.35 mol) and  $\text{NH}_4\text{SCN}$  (53.3 g, 0.70 mol) were dissolved in AcOH (300 mL). The solution was stirred at r.t. for 0.5 h. Bromine (36.0 mL, 0.70 mol) in AcOH (25 mL) was added dropwise to above the solution at  $20^\circ\text{C}$  for 1 d. The reaction mixture was quenched with water (300 mL) and additionally stirred for 1 h at r.t. The resulting precipitate was filtered, washed with water, and dried under air. The crude product was used to the next step without further purification (75 g, pale yellow solid).

$^1\text{H}$  NMR (300 MHz,  $\text{CDCl}_3$ )  $\delta$  7.40 (d,  $J = 1.7$  Hz, 1H), 7.11 (d,  $J = 1.3$  Hz, 1H), 5.35 (s, 2H), 2.52 (s, 3H).

### Step 2. Synthesis of 2-amino-5-chloro-3-methylbenzenethiol (4)

The benzothiazole **3** (70 g, 0.35 mol) was dissolved in 2-methoxyethanol (200 mL) and hydrazine monohydrate (262 mL, 5.2 mol). The resulting solution was heated to  $150^\circ\text{C}$  for 2 d. After cooling, the mixture was filtered to remove solid impurities, and then the organic layer was diluted with water and acidified to pH 6 using 2 N HCl. The crude product was extracted with EtOAc, dried over  $\text{MgSO}_4$ , and evaporated. The crude product was used to the next step without further purification (31.9 g, pale yellow solid).

$^1\text{H}$  NMR (300 MHz,  $\text{CDCl}_3$ )  $\delta$  7.06 (d,  $J = 1.8$  Hz, 1H), 7.02 (d,  $J = 2.4$  Hz, 1H), 4.28 (s, 2H), 2.15 (s, 4H).

### Step 3. Synthesis of 4-chloro-2-methyl-6-(methylthio)aniline (**5**)

To a stirred solution of the thiol **4** (31.9 g, 0.184 mol) in THF (200 mL) was added *t*-BuOK (23 g, 0.202 mol) in portions at 0 °C under N<sub>2</sub> atmosphere. After 1 h stirring at r.t., MeI (10.9 ml, 0.175 mol) in THF (50 mL) was added dropwise to the mixture at 0 °C. The resulting solution was stirred at r.t. for 2 h. The reaction was quenched with water and the reaction mixture was extracted with EtOAc. The combined organic layer was washed with brine, dried over MgSO<sub>4</sub>, and evaporated. The crude product was used to the next step without further purification (33.9 g, pale brown oil).

<sup>1</sup>H NMR (300 MHz, CDCl<sub>3</sub>) δ 7.20 (d, *J* = 2.3 Hz, 1H), 6.95 (d, *J* = 1.9 Hz, 1H), 4.21 (s, 2H), 2.35 (s, 3H), 2.14 (s, 3H).

### Step 4. Synthesis of 3-bromo-*N*-(4-chloro-2-methyl-6-(methylthio)phenyl)-1-(3-chloropyridin-2-yl)-1H-pyrazole-5-carboxamide (**6**)

Aniline **5** (33.0 g, 0.176 mol), carboxylic acid<sup>1</sup> (58.6 g, 0.194 mol), and 3-picoline (32 ml, 0.35 mol) were dissolved in anhydrous MeCN (300 mL). To the mixture, MsCl (21 ml, 0.26 mol) was added dropwise at 0 °C under N<sub>2</sub> atmosphere. After 24 h stirring at 30 °C, the reaction was quenched with water and the reaction mixture was extracted with EtOAc. The combined organic layer was washed with sat. NaHCO<sub>3</sub>(aq), dried over MgSO<sub>4</sub>, and evaporated. The crude solid was triturated with Hex. and small amount of EtOAc to give pure product (68.5 g, 41% for 4 steps, pale brown solid).

m.p. 157–158 °C; <sup>1</sup>H NMR (300 MHz, CDCl<sub>3</sub>) δ 8.45 (dd, *J* = 4.7, 1.6 Hz, 1H), 7.86 (dd, *J* = 8.1, 1.6 Hz, 1H), 7.50 (s, 1H), 7.38 (dd, *J* = 8.0, 4.7 Hz, 1H), 7.00 (d, *J* = 1.9 Hz, 2H), 6.97 (s, 1H), 2.40 (s, 3H), 2.17 (s, 3H). <sup>13</sup>C NMR (100 MHz, CDCl<sub>3</sub>) δ 155.98, 148.63, 146.86, 139.27, 138.89, 138.65, 138.34, 133.96, 129.36, 128.98, 128.13, 127.18, 125.83, 122.92, 110.56, 18.42, 15.43. IR (neat) 3437, 3257, 3134, 2975, 2923, 1685, 1572, 1523, 1490, 1460, 1346, 1287, 1250, 1182, 1072, 1043, 1024, 960, 839, 805 cm<sup>-1</sup>. HRMS (EI) calcd for C<sub>17</sub>H<sub>13</sub>BrCl<sub>2</sub>N<sub>4</sub>OS [M]<sup>+</sup> 469.9370, found 469.9353.

---

<sup>1</sup> (a) X. Hua, W. Mao, Z. Fan, X. Ji, F. Li, G. Zong, H. Song, J. Li, L. Zhou, L. Zhou, X. Liang, G. Wang, X. Chen, *Aust. J. Chem.* **2014**, *67*, 1491. (b) C. Gnam, A. Jeanguenat, A. C. Dutton, C. Grimm, D. P. Kloer, *Bioorg. Med. Chem. Lett.* **2012**, *22*, 3800. (c) J. Zhang, J. Xu, B. Wang, Y. Li, L. Xiong, Y. Li, Y. Ma, Z. Li, *J. Agric. Food Chem.* **2012**, *60*, 7565. (d) G. P. Lahm, T. M. Stevenson, T. P. Selby, J. H. Freudenberger, D. Cordova, L. Flexner, C. A. Bellin, C. M. Dubas, B. K. Smith, K. A. Hughes, J. G. Hollingshaus, C. E. Clark, E. A. Benner, *Bioorg. Med. Chem. Lett.* **2007**, *17*, 6274.

## Synthetic procedure for Imination and Oxidation

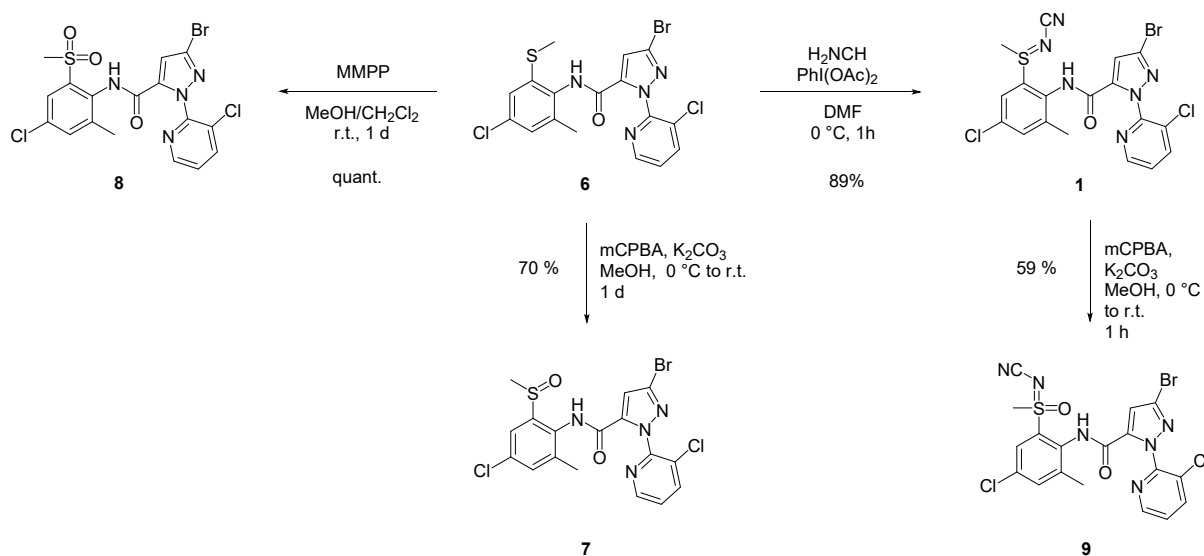

Synthesis of 3-bromo-*N*-(4-chloro-2-(*N*-cyano-*S*-methylsulfinimidoyl)-6-methylphenyl)-1-(3-chloropyridin-2-yl)-1*H*-pyrazole-5-carboxamide (**1**)

To a stirred solution of the sulfide **6** (12.1 g, 25.6 mmol) in DMF (50 mL) was added H<sub>2</sub>NCN (1.18 g, 28.2 mmol) and PhI(OAc)<sub>2</sub> (9.08 mg, 28.2 mmol). The resulting mixture was stirred at 0 °C. The mixture was diluted with water, and the reaction mixture was extracted with EtOAc, dried over Na<sub>2</sub>SO<sub>4</sub> and evaporated. The crude solid was recrystallized with CH<sub>3</sub>CN/diethyl ether to give pure product **1** (12.5 g, 95%).

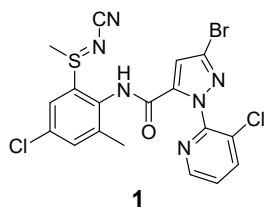

m.p. 151–152 °C. <sup>1</sup>H NMR (400 MHz, CDCl<sub>3</sub>) δ 10.42 (s, 1H), 8.42 (dd, *J* = 4.7, 1.6 Hz, 1H), 7.84 (dd, *J* = 8.0, 1.6 Hz, 1H), 7.73 (d, *J* = 2.3 Hz, 1H), 7.43 (d, *J* = 2.3 Hz, 1H), 7.39 (s, 1H), 7.37 (dd, *J* = 8.0, 4.7 Hz, 1H), 2.75 (s, 3H), 2.26 (s, 3H). <sup>13</sup>C NMR (100 MHz, CDCl<sub>3</sub>) δ 157.66, 149.22, 146.77, 140.00, 138.86, 137.44, 136.42, 135.27, 135.16, 131.37, 129.08, 128.43, 125.79, 122.81, 121.17, 112.14, 38.18, 18.03. IR (neat) 3444(br), 3135, 2153, 1676, 1574, 1529, 1463, 1353, 1297, 1175, 1074, 1022, 961, 805, 760 cm<sup>-1</sup>. HRMS (FAB) calcd for C<sub>18</sub>H<sub>14</sub>BrCl<sub>2</sub>N<sub>6</sub>OS [M+H]<sup>+</sup> 510.9510, found 510.9511.

Synthesis of 3-bromo-*N*-(4-chloro-2-methyl-6-(methylsulfonyl)phenyl)-1-(3-chloropyridin-2-yl)-1H-pyrazole-5-carboxamide (**8**)

To a stirred solution of the sulfide **6** (7.6 g, 0.016 mol) in CH<sub>2</sub>Cl<sub>2</sub>/MeOH (1:1, 10 mL) was added MMPP (Magnesium monoperoxyphthalate 6H<sub>2</sub>O) (18.5 g, 0.048 mol). The resulting mixture was stirred at r.t. for 1 d. The reaction mixture was diluted with water and extracted with EtOAc. The combined organic layers were washed with sat. NaHCO<sub>3</sub> and brine. The organic layer was dried over MgSO<sub>4</sub>, filtered and evaporated. The crude solid was recrystallized with EtOAc (quantitative) **8**.

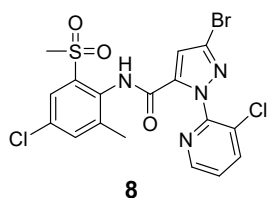

m.p. 197–198 °C. <sup>1</sup>H NMR (300 MHz, CDCl<sub>3</sub>) δ 8.93 (s, 1H), 8.40 (dd, *J* = 4.7, 1.6 Hz, 1H), 7.90 (dd, *J* = 8.1, 1.6 Hz, 1H), 7.85 (dd, *J* = 2.5, 0.6 Hz, 1H), 7.51 (d, *J* = 2.4 Hz, 1H), 7.40 (dd, *J* = 8.1, 4.7 Hz, 1H), 7.05 (s, 1H), 3.05 (s, 3H), 2.25 (s, 3H). <sup>13</sup>C NMR (100 MHz, CDCl<sub>3</sub>) δ 155.38, 148.56, 146.78, 140.58, 139.34, 138.07, 136.78, 136.06, 133.54, 131.01, 128.75, 128.45, 127.11, 125.95, 111.18, 43.62, 18.87. IR (neat) 3326, 3062, 2927, 2855, 1688, 1572, 1528, 1497, 1465, 1357, 1300, 1236, 1193, 1134, 960, 880, 812, 783 cm<sup>-1</sup>. HRMS (FAB) calcd for C<sub>17</sub>H<sub>14</sub>BrCl<sub>2</sub>N<sub>4</sub>O<sub>3</sub>S [M+H]<sup>+</sup> 502.9347, found 502.9339.

Synthesis of 3-bromo-*N*-(4-chloro-2-methyl-6-(methylsulfinyl)phenyl)-1-(3-chloropyridin-2-yl)-1H-pyrazole-5-carboxamide (**7**) and 3-bromo-*N*-(4-chloro-2-(*N*-cyano-*S*-methylsulfonylimidoyl)-6-methylphenyl)-1-(3-chloropyridin-2-yl)-1H-pyrazole-5-carboxamide (**9**)

To a solution of sulfide **6** or sulfilimine **1** in MeOH was added K<sub>2</sub>CO<sub>3</sub> (2.0–6.0 eq.) at 0 °C. After 1 h, *m*CPBA (1.5–4.5 eq) was added and the reaction mixture was stirred at room temperature. The reaction mixture was quenched with 1 N HCl (aq.) at 0 °C and extracted with EtOAc. The combined organic layer was dried over Na<sub>2</sub>SO<sub>4</sub> and evaporated. The crude product was purified by column to obtain oxidation compound.

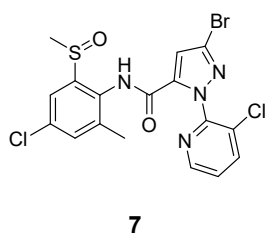

m.p. 218–219 °C. <sup>1</sup>H NMR (300 MHz, CDCl<sub>3</sub>) δ 9.78 (s, 1H), 8.44 (dd, *J* = 4.7, 1.6 Hz, 1H), 7.85 (dd, *J* = 8.0, 1.6 Hz, 1H), 7.38 (dd, *J* = 8.0, 4.7 Hz, 1H), 7.31 (d, *J* = 2.4 Hz, 1H), 7.25–7.22 (m, 2H), 2.72 (s, 3H), 2.18 (s, 3H). <sup>13</sup>C NMR (100 MHz, CDCl<sub>3</sub>) δ 156.86, 149.12, 146.84, 139.44, 138.85, 137.78,

134.38, 133.68, 130.33, 129.05, 128.38, 125.81, 121.64, 111.30, 41.95, 17.89. IR (neat) 3433, 3168, 3058, 2923, 2853, 1674, 1575, 1531, 1492, 1467, 1414, 1357, 1295, 1177, 1074, 1029, 960, 873, 828, 800, 761  $\text{cm}^{-1}$ . HRMS (EI) calcd for  $\text{C}_{17}\text{H}_{13}\text{BrCl}_2\text{N}_4\text{O}_2\text{S}$   $[\text{M}]^+$  485.9320, found 485.9313.

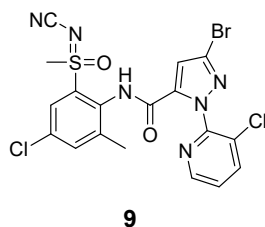

m.p. 179–180 °C.  $^1\text{H}$  NMR (400 MHz,  $\text{CDCl}_3$ )  $\delta$  8.99 (s, 1H), 8.40 (dd,  $J = 4.6, 1.6$  Hz, 1H), 7.92–7.86 (m, 2H), 7.62 (d,  $J = 2.5$  Hz, 1H), 7.39 (dd,  $J = 8.0, 4.7$  Hz, 1H), 7.15 (s, 1H), 3.30 (s, 3H), 2.27 (s, 3H).  $^{13}\text{C}$  NMR (100 MHz, MeOD)  $\delta$  157.65, 148.50, 146.71, 143.06, 139.59, 138.58, 137.29, 136.06, 134.38, 128.75, 127.68, 127.63, 126.41, 111.55, 111.27, 42.13, 16.77. IR (neat) (br) 3193, 3075, 3011, 2930, 2202, 1688, 1528, 1495, 1464, 1349, 1292, 1251, 1200, 1180, 983, 961, 882, 828, 806  $\text{cm}^{-1}$ . HRMS (FAB) calcd for  $\text{C}_{18}\text{H}_{14}\text{BrCl}_2\text{N}_6\text{O}_2\text{S}$   $[\text{M}+\text{H}]^+$  526.9459, found 526.9453.

# <sup>1</sup>H and <sup>13</sup>C NMR of compound 1

KI-2307.1.fid  
KI-2307

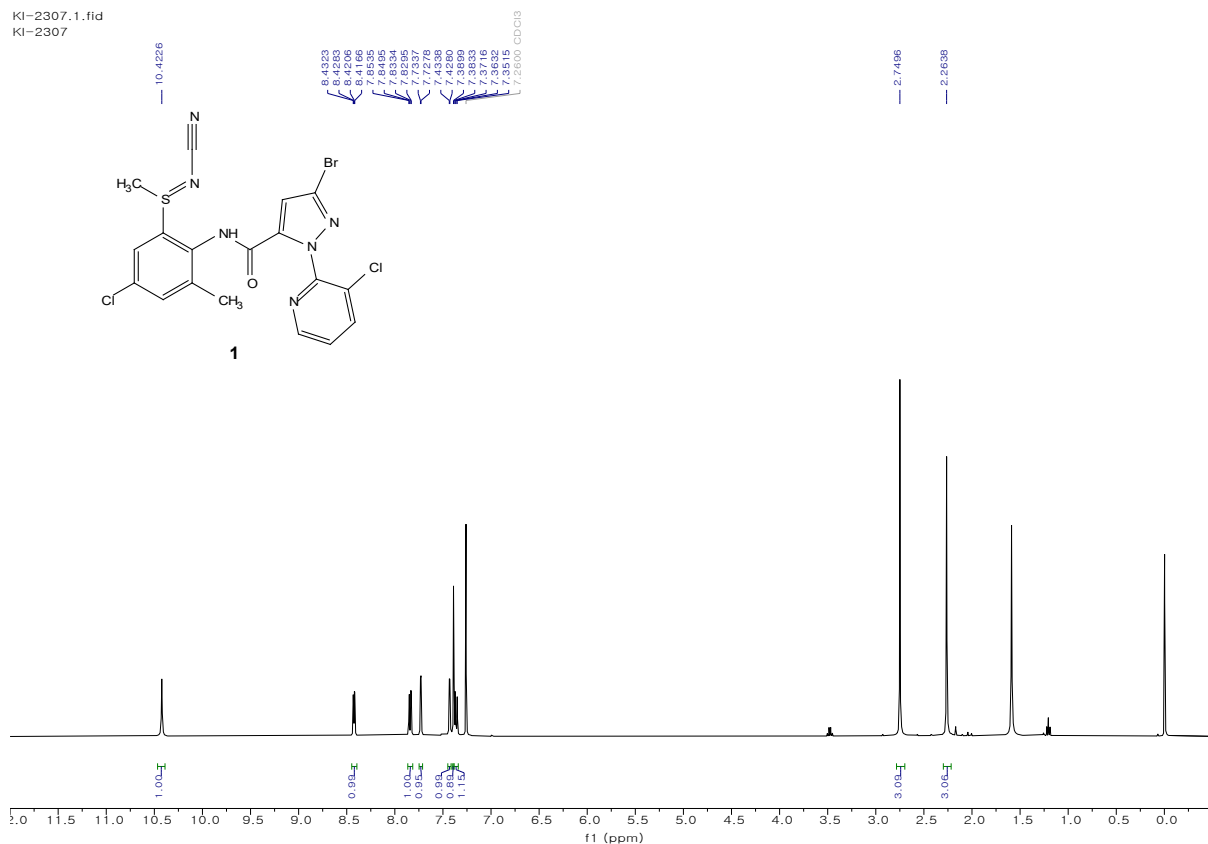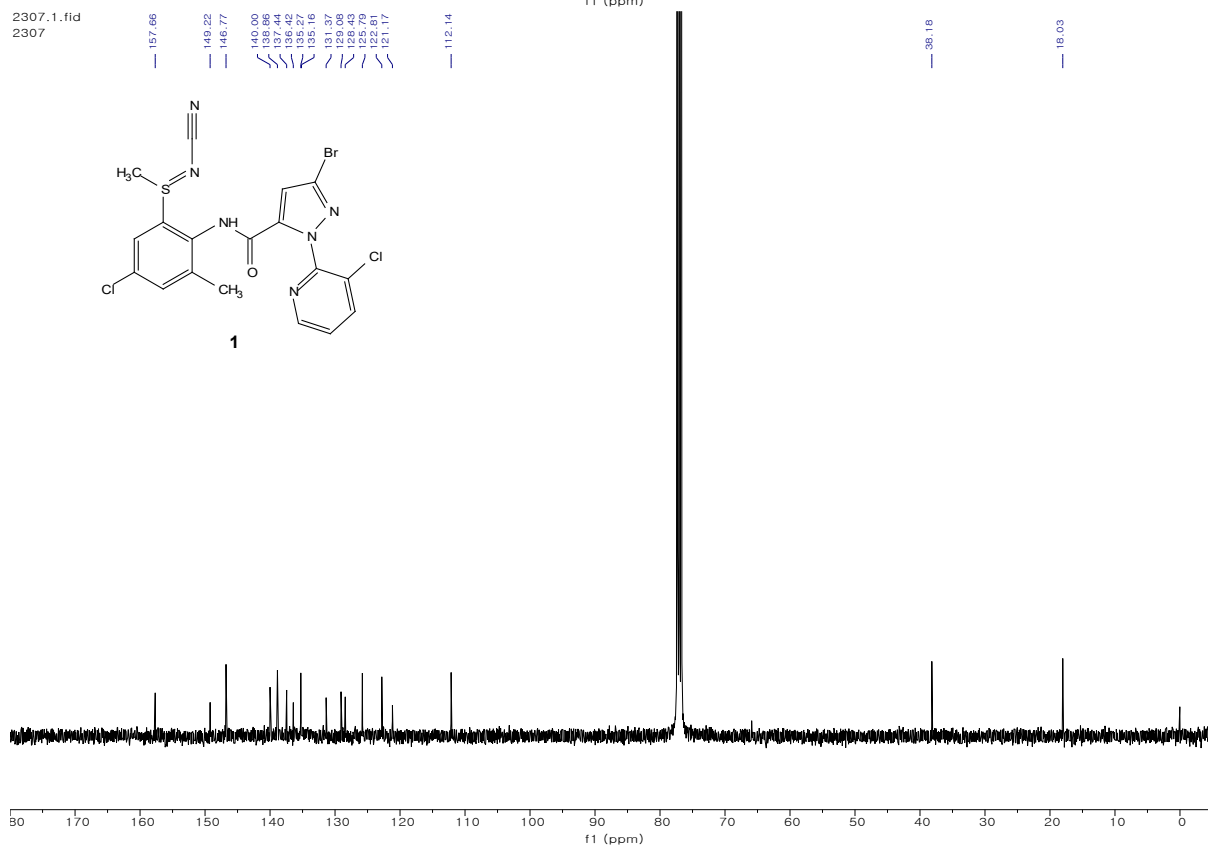

# <sup>1</sup>H and <sup>13</sup>C NMR of compound 6



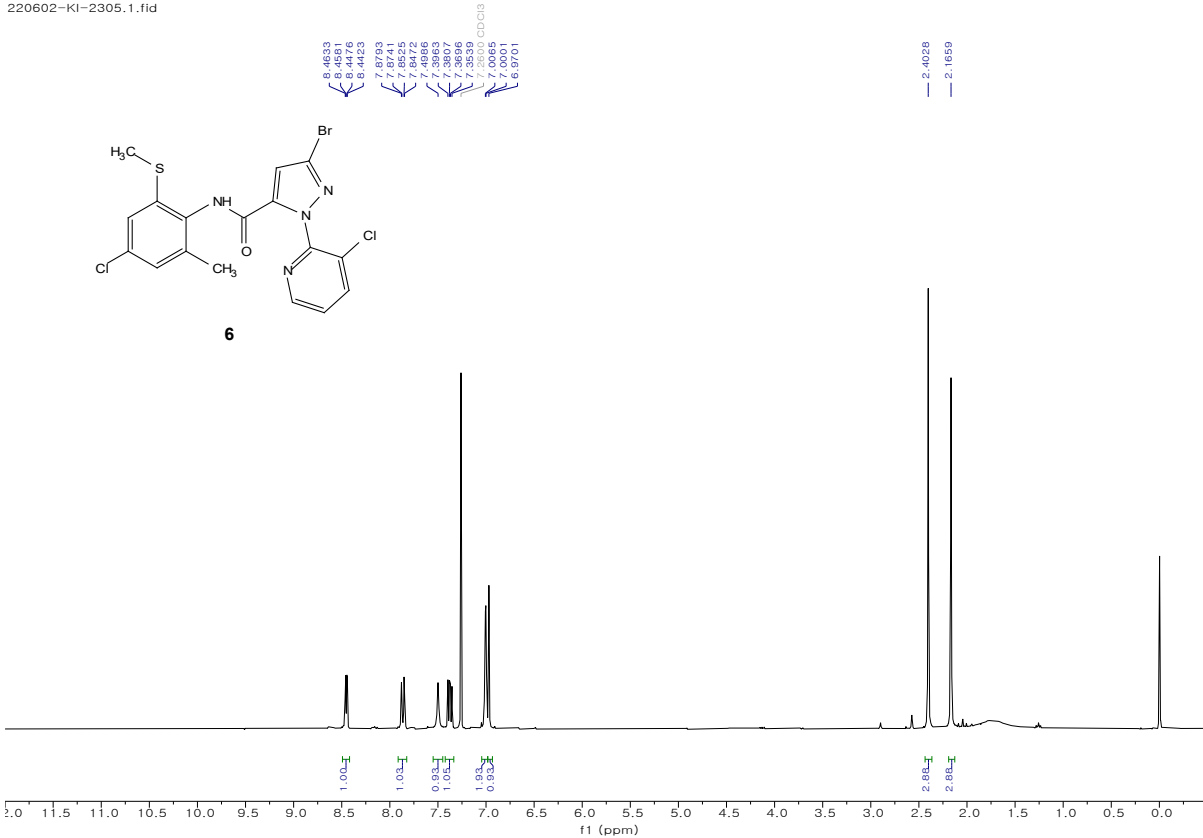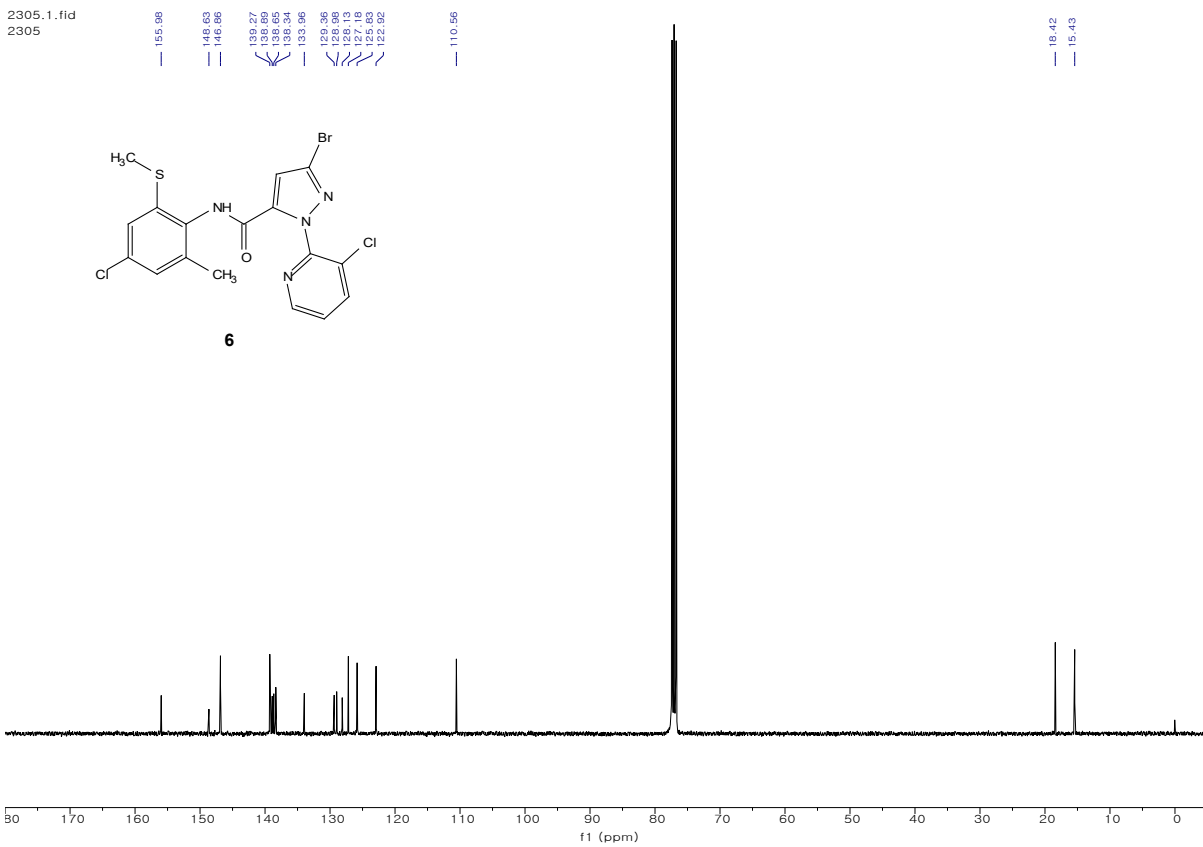

# <sup>1</sup>H and <sup>13</sup>C NMR of compound 7

KOY-C-30.1.fid

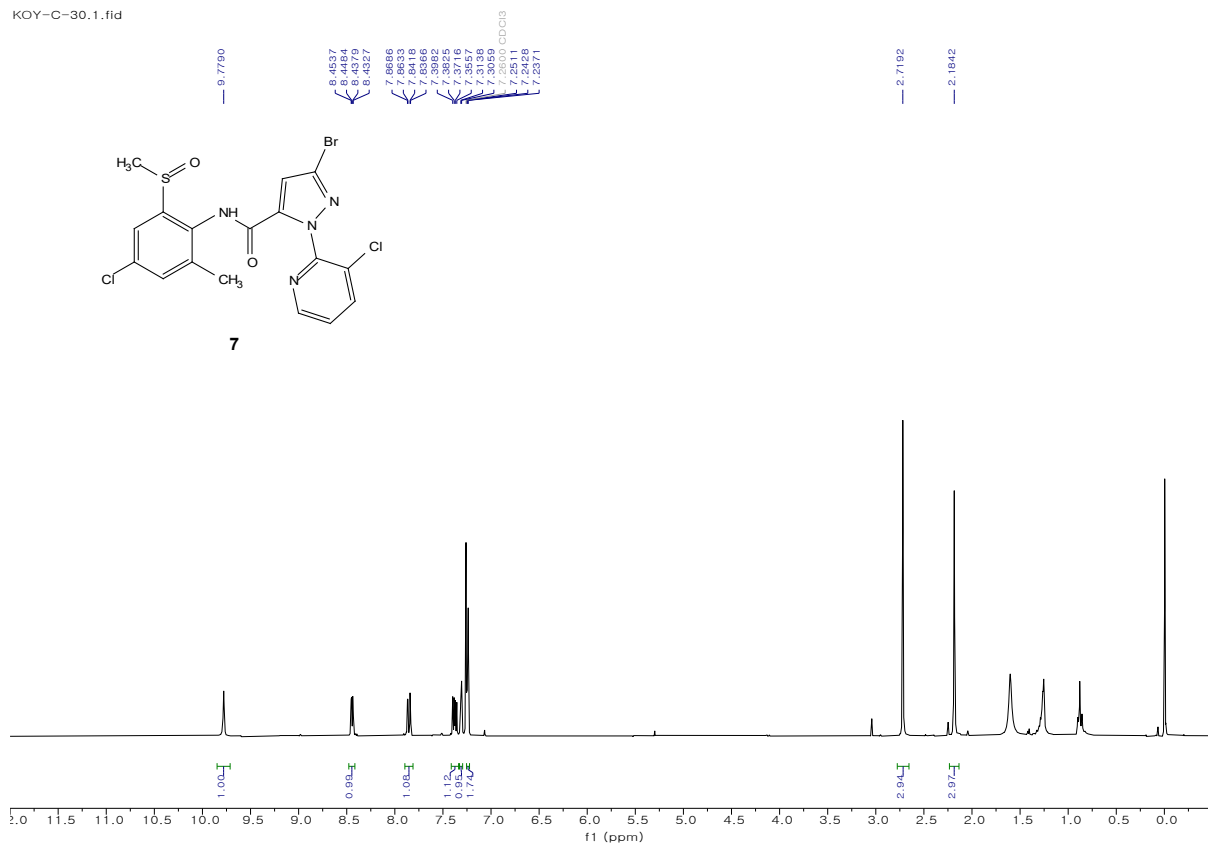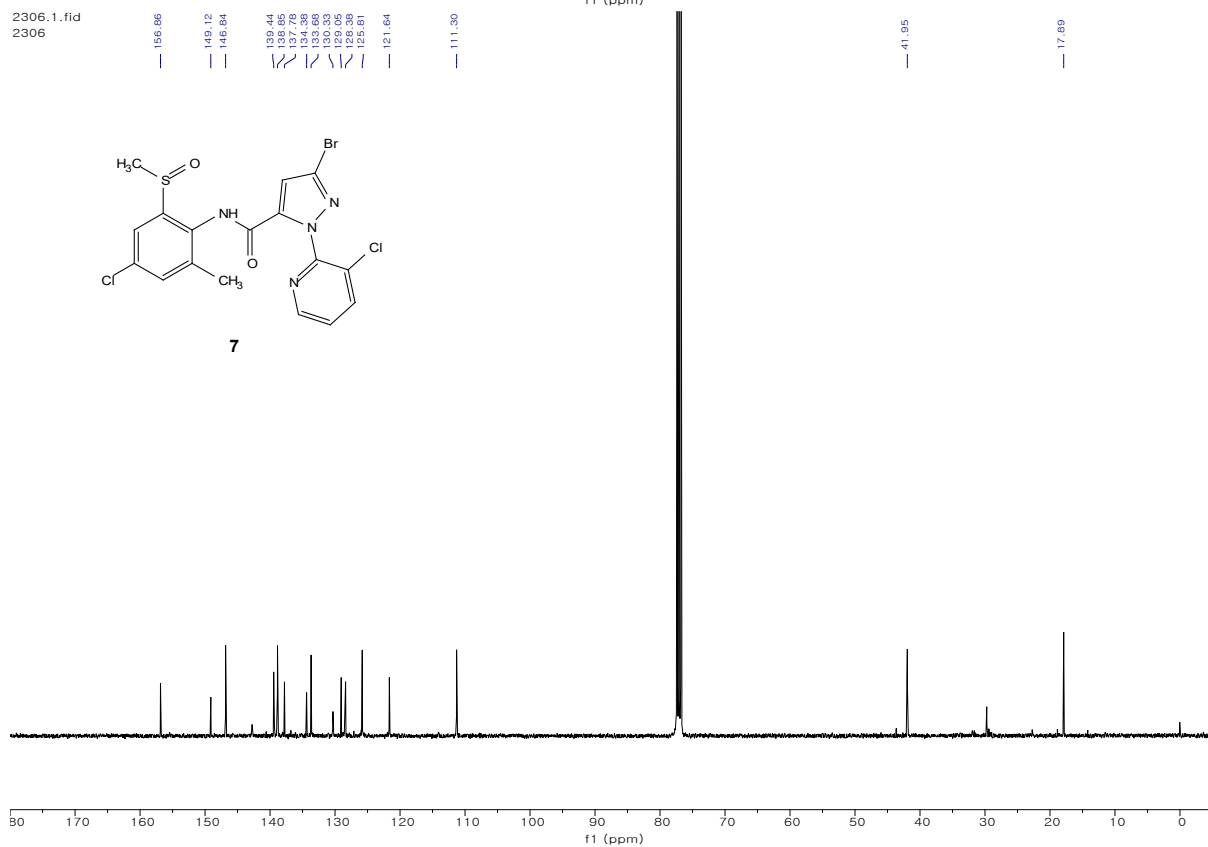

# <sup>1</sup>H and <sup>13</sup>C NMR of compound 8

KI-2308-CDCl3.1.fid

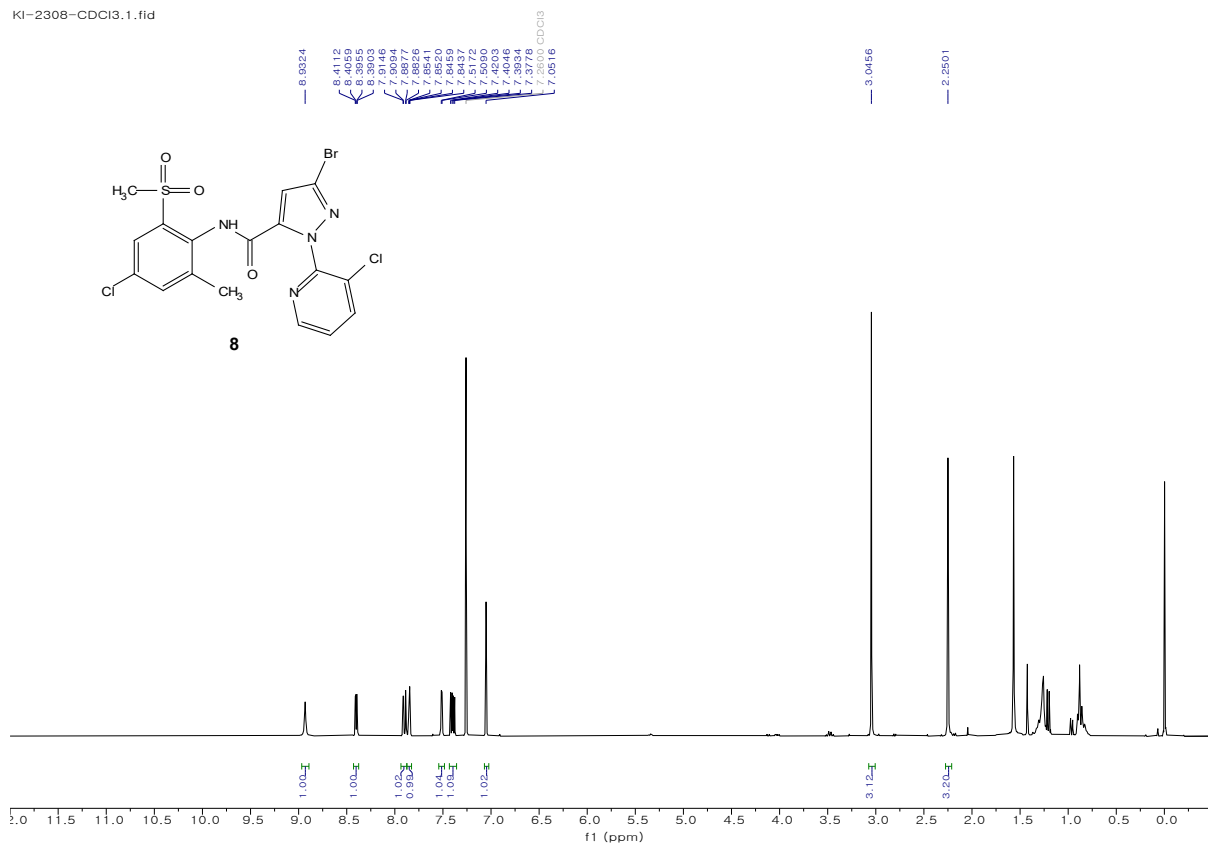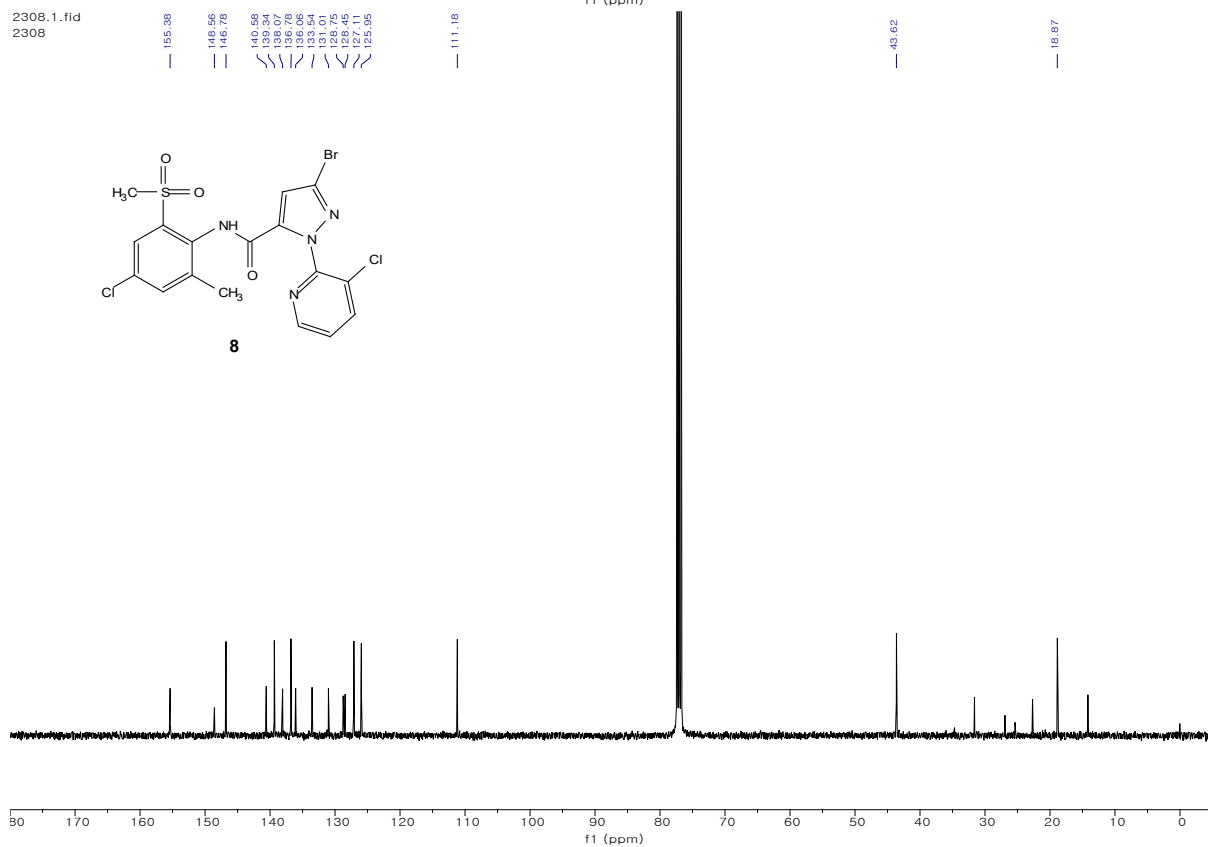

# <sup>1</sup>H and <sup>13</sup>C NMR of compound 9

KI-2312.1.fid  
KI-2312

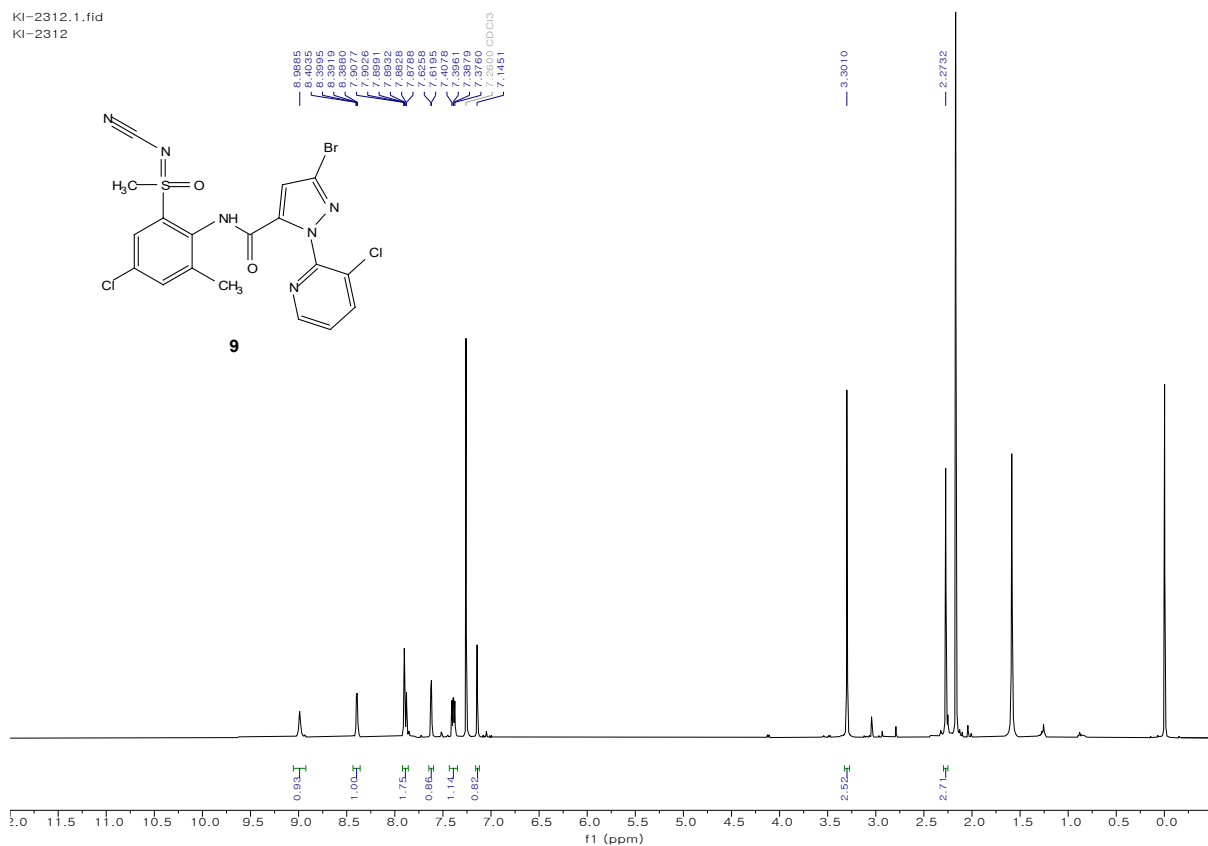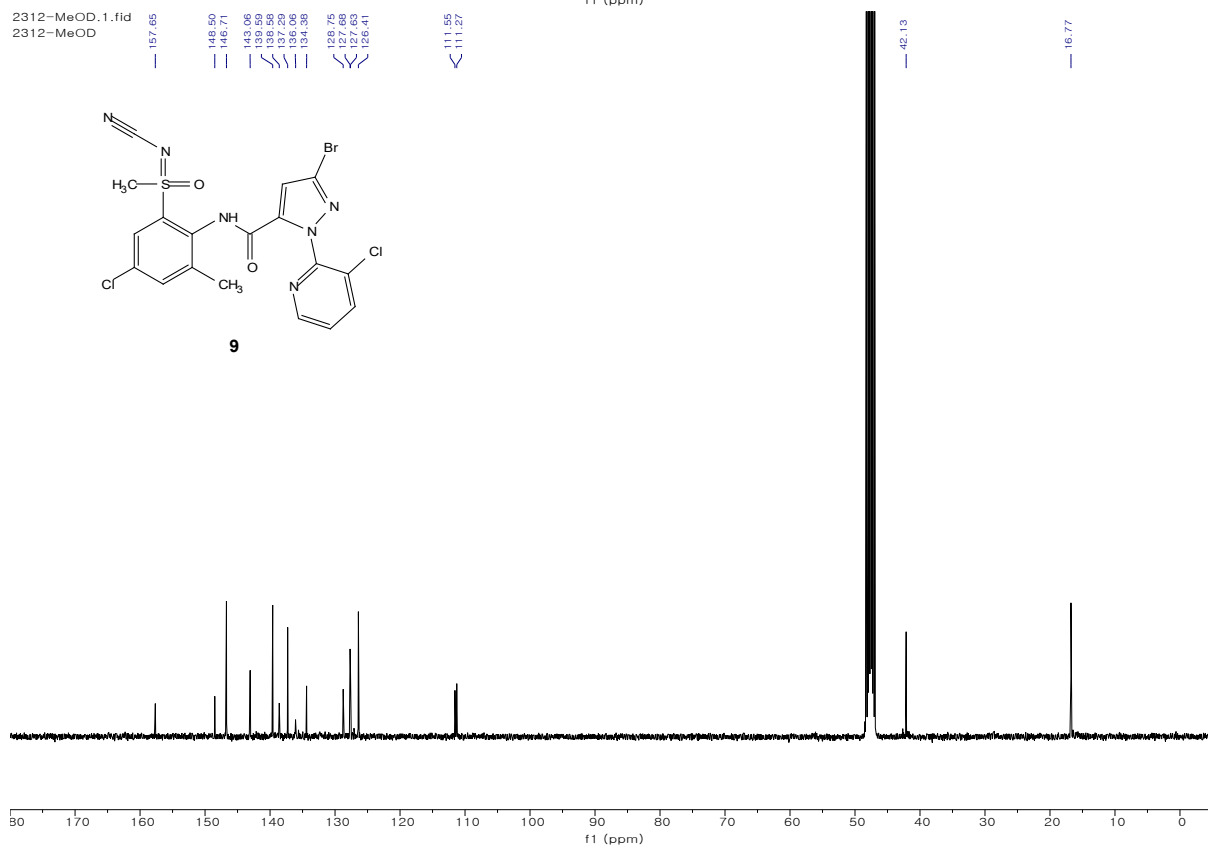

## IR spectrum of organosulfur compounds

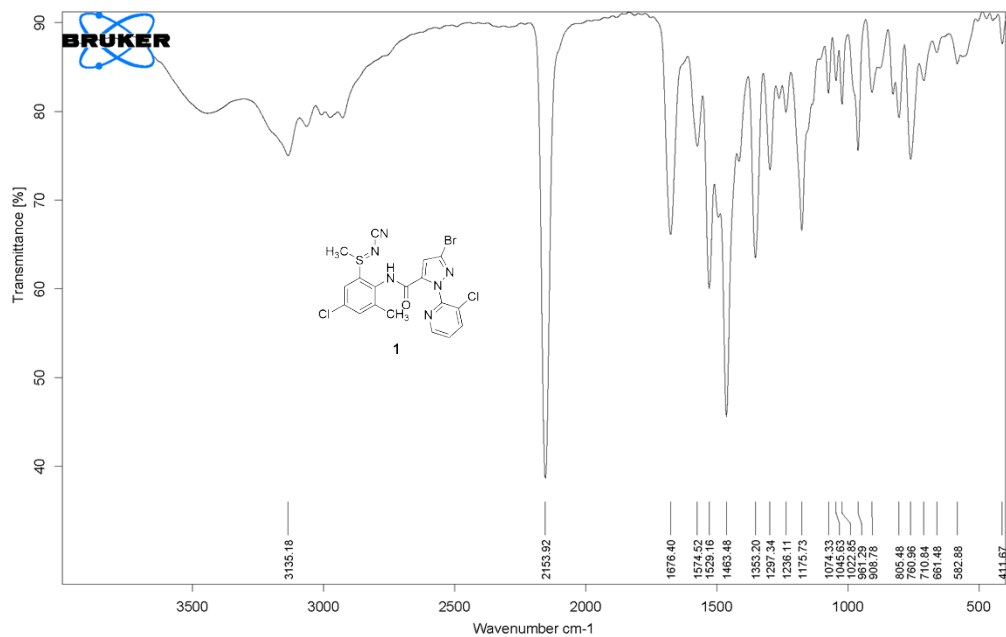

D:\PC\A\2020\08-in\KI-2307.0

KI-2307

2020-08-12

Page 1/1

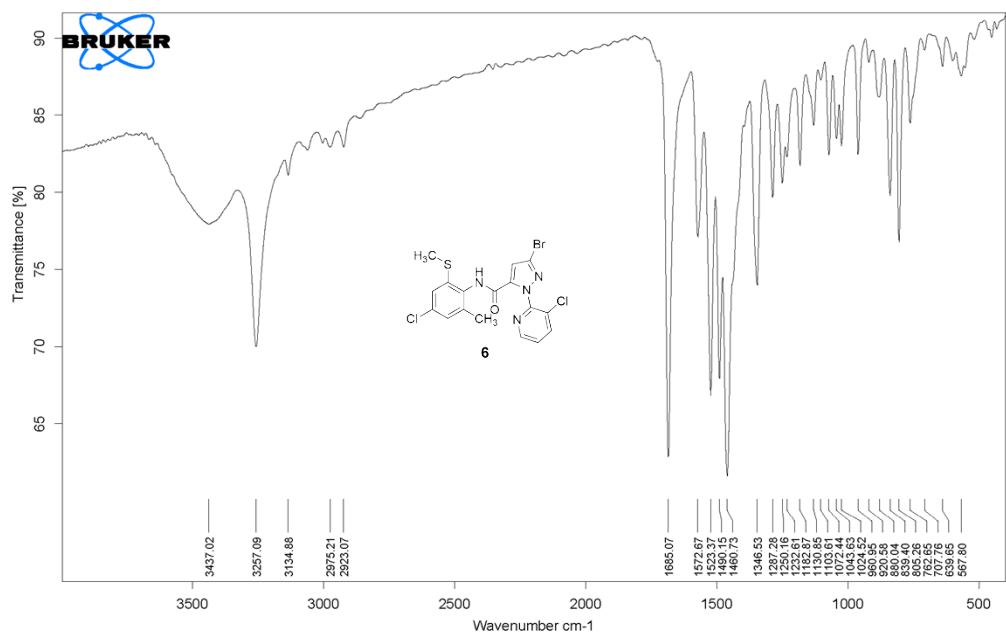

D:\PC\A\2021\12-in\KI-2305.0

KI-2305

2021-12-29

Page 1/1

## IR spectrum of organosulfur compounds

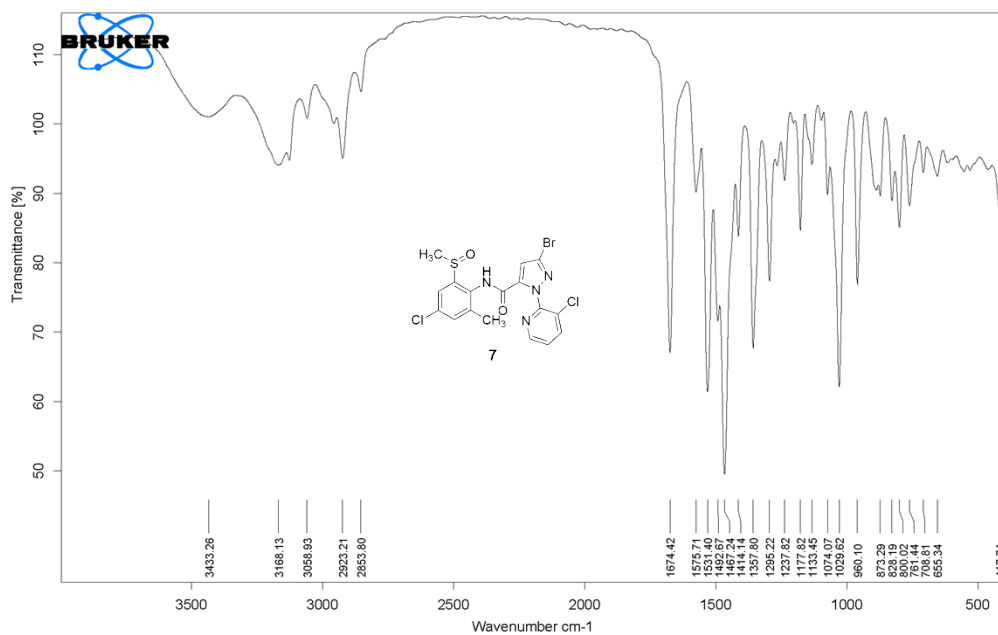

D:\PC\A\2021\12-in\KI-2306.0

KI-2306

2021-12-29

Page 1/1

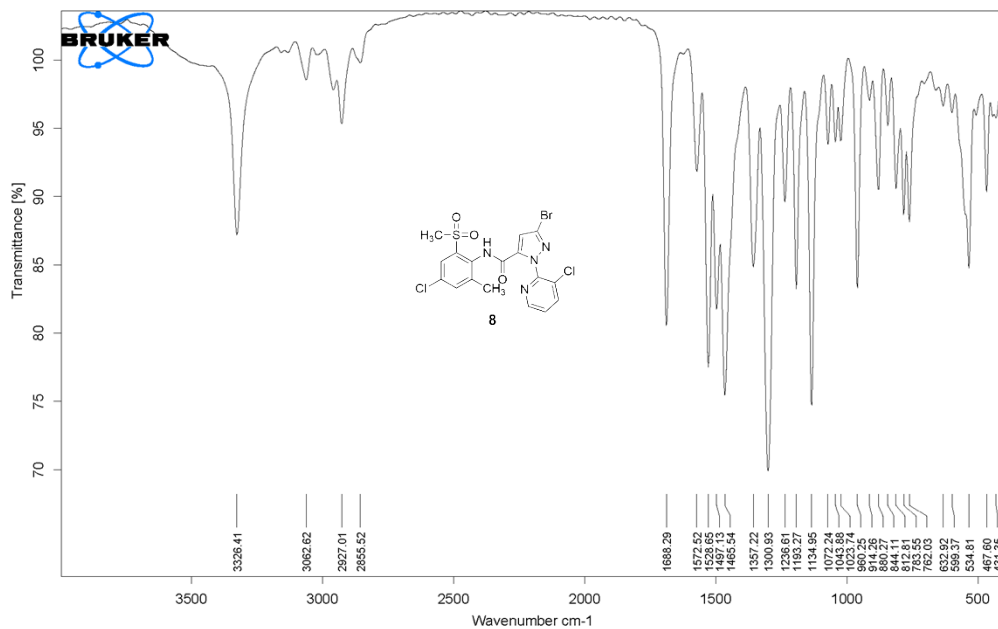

D:\PC\A\2020\08-in\KI-2308.0

KI-2308

2020-08-12

Page 1/1

## IR spectrum of organosulfur compounds

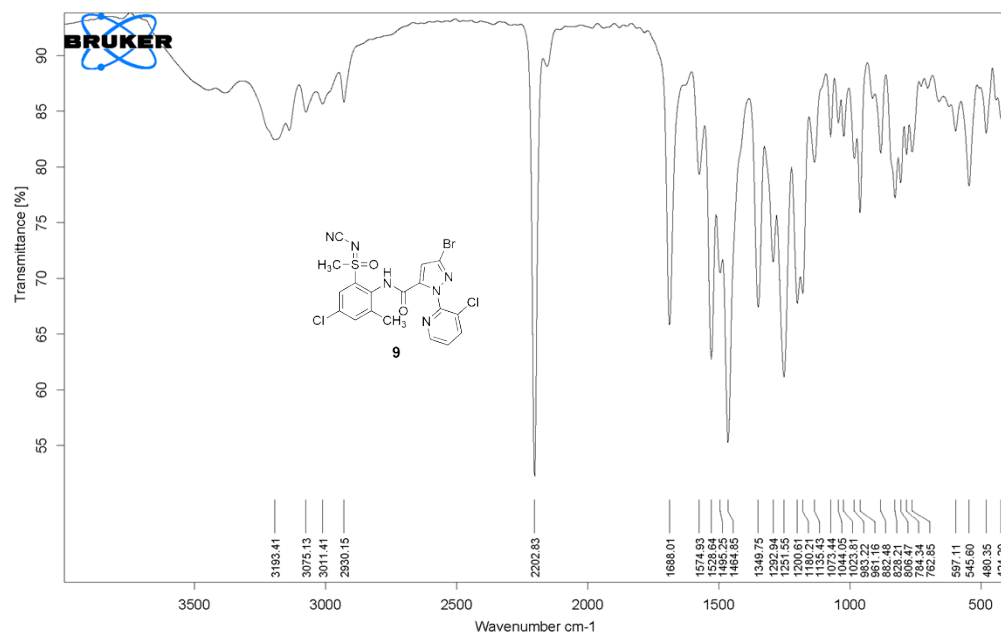

D:\PC\A\2020\08-in\KI-2312.0 KI-2312

2020-08-12

## Physicochemical properties organosulfur compounds

**Table S1.** Physicochemical properties of compounds and Chlorantraniliprole

| Entry | Compd                                      | Solubility <sup>a,b</sup>               | pKa        | Log P <sup>c,d</sup> | Permeability <sup>e</sup> |
|-------|--------------------------------------------|-----------------------------------------|------------|----------------------|---------------------------|
| 1     | <b>1</b><br>( <i>N</i> -Cyano sulfilimine) | 232.3 ± 3.53 μM<br>(119.0 ± 1.81 μg/mL) | 8.44       | 3.37                 | -4.15 ± 0.013             |
| 2     | <b>7</b><br>(Sulfoxide)                    | 126.0 ± 19.7 μM<br>(61.5 ± 9.63 μg/mL)  | 8.90       | 3.60                 | - 4.163 ± 0.071           |
| 3     | <b>8</b><br>(Sulfone)                      | >495 μM<br>(>250 μg/mL)                 | 8.95       | 4.34                 | -4.29 ± 0.167             |
| 4     | <b>9</b><br>( <i>N</i> -Cyano sulfoximine) | > 495 μM<br>(> 261 μg/mL)               | 8.15       | 4.01                 | - 4.227 ± 0.069           |
| 5     | <b>Chlorantraniliprole</b>                 | 21.5 ± 1.59 μM<br>(10.4 ± 0.771 μg/mL)  | 1.52/10.77 | 5.25                 | - 4.3 ± 0.046             |

<sup>a</sup> Method for determination of equilibrium solubility: μSOL<sup>2</sup>; <sup>b</sup> at 25°C and pH 7.4; <sup>c</sup> Using ACD / Labs T3 method (pH – metric); <sup>d</sup> for graphs, please see the supporting information, <sup>e</sup> Method for determination of permeability: PAMPA<sup>3</sup>

<sup>2</sup> A. Avdeef, C. M. Berger, C. Brownell, pH-Metric Solubility. 2. Correlation Between the Acid-Base Titration and the Saturation Shake-Flask Solubility-pH Methods, *Pharm. Res.*, **2000**, *17*, 85 (Part 2 in pSOL series).

<sup>3</sup> A. Avdeef, P. Artursson, S. Neuhoff, L. Lazarova, J. Gråsjö, S. Tavelin, Caco-2 permeability of weakly basic drugs predicted with the double-sink PAMPA pKaflux Method. *Eur. J. Pharm. Sci.*, **2005**, *24*, 333.



## Larvicidal activity against Spodoptera

The larvicidal activities of synthesized compounds were evaluated using the leaf-dip procedure by Kyung Nong Co. Ltd., Korea.<sup>4</sup> The aqueous solution of prepared compounds and chlorantraniliprole in acetone (H<sub>2</sub>O : acetone = 95 : 5) were sprayed to a cabbage leave placed on moistened filter paper (disc, diameter 8.8 cm) in petri dishes. After allowing to dry, the dishes were infested with 10 *Spodoptera litura* (third-instar). After 1, 2, 3, and 4 days, percentage of mortalities was evaluated. The treatments were replicated three times.

**Table S2.** Larvicidal activity depend on time

| Entry | Compd                      | Funtionality                | Concentration (ppm) | Against the 3 <sup>rd</sup> instar larvae of <i>Spodoptera litura</i> |      |      |      |                 |
|-------|----------------------------|-----------------------------|---------------------|-----------------------------------------------------------------------|------|------|------|-----------------|
|       |                            |                             |                     | Larvicidal activity (%)                                               |      |      |      | Eating area (%) |
|       |                            |                             |                     | 24 h                                                                  | 48 h | 72 h | 96 h | 96 h            |
| 1     | <b>1</b>                   | <i>N</i> -Cyano sulfilimine | 12.5                | 3.3                                                                   | 50.0 | 100  | 100  | 0 – 5           |
|       |                            |                             | 6.25                | 0.0                                                                   | 43.3 | 100  | 100  | 0 – 5           |
| 2     | <b>7</b>                   | Sulfoxide                   | 50                  | 3.3                                                                   | 46.7 | 93.3 | 100  | 5 – 10          |
| 3     | <b>8</b>                   | Sulfone                     | 12.5                | 0.0                                                                   | 50.7 | 96.7 | 100  | 0 – 5           |
|       |                            |                             | 6.25                | 0.0                                                                   | 46.7 | 96.7 | 100  | 0 – 5           |
| 4     | <b>9</b>                   | <i>N</i> -Cyano sulfoximine | 50                  | 0.0                                                                   | 3.3  | 10.0 | 16.7 | 10 – 30         |
| 5     | <b>Chlorantraniliprole</b> |                             | 12.5                | 10.0                                                                  | 70.0 | 96.7 | 100  | 0 – 5           |
|       |                            |                             | 6.25                | 10.0                                                                  | 60.0 | 90.0 | 100  | 0 – 5           |

<sup>4</sup> (a). Lim, H. J.; Lee, W. H.; Park, S. J. Synthesis, Physicochemical Properties, and Biological Activities of 4-(*S*-Methyl-*N*-(2,2,2-Trifluoroacetyl)Sulfilimidoyl) Anthranilic Diamide. *Molecules* **2019**, *24*, 3451. (b) Park, S. J.; Lim, H. J.; Kim, B. T. Pyrazole carboxamide compound containing organosulfur group and pesticide composition containing pyrazole carboxamide compound. WO Patent WO2019/156425 A1, 2019. (c) Chang, S. Y.; Heo, J. N.; Lee, H.; Lim, H. J.; Kim, B. T.; Kim, J. K.; Kim, J. Diaminoaryl Derivatives Substituted by Carbamate and Pesticidal Composition Containing Same. WO2013/168967 A1, 2013.

**Table S3.** Picture of eating area

| Entry | Compd                      | Pictures of eating area_ after 96 h<br>(The 3 <sup>rd</sup> instar stage larvae of <i>Spodoptera litura</i> ) |
|-------|----------------------------|---------------------------------------------------------------------------------------------------------------|
| 1     | 1                          | <br>0 – 5 % eating          |
| 2     | 8                          | <br>0 – 5 % eating         |
| 3     | 9                          | <br>10 – 30 % eating      |
| 2     | <b>Chlorantraniliprole</b> | <br>0 – 5 % eating        |

| Entry | Compd                      | Pictures of eating area_ after 96 h<br>(The 3 <sup>rd</sup> instar stage larvae of Spodoptera litura)                                  |
|-------|----------------------------|----------------------------------------------------------------------------------------------------------------------------------------|
| 1     | 7                          |  <p data-bbox="919 636 1091 667">5 – 10 % eating</p> |
| 2     | <b>Chlorantraniliprole</b> |  <p data-bbox="919 987 1091 1019">0 – 5 % eating</p> |

## Field test

### Against diamondback moth

The open-field test was conducted with sowing radish (*Raphanus sativus*, Shindongha) at Ipsil-ri, Oedong-eup, Gyeongju-si, Gyeongsangbuk-do, South Korea. Before the treatment of compound **1**, it was occurred an average of 33.3 larvae (10 leaves) and mostly 3~4 the 3rd or 4th stage larvae. It was suitable for the test. Using engine-type power sprayer (ARIMITSU), compound **1** was treated in triplicate in 10 m<sup>2</sup>, and it was repeated three times. The spray volume in compound **1** was 1.5 liters per 20 m<sup>2</sup>. Compound **1** (10% WP) was diluted 4,000-fold in water and treated at concentrations of 25 ppm. For the reference, chlorantraniliprole 5% WG (Farm Hannong, Altacore) was diluted 2,000 times and treated with 25ppm.

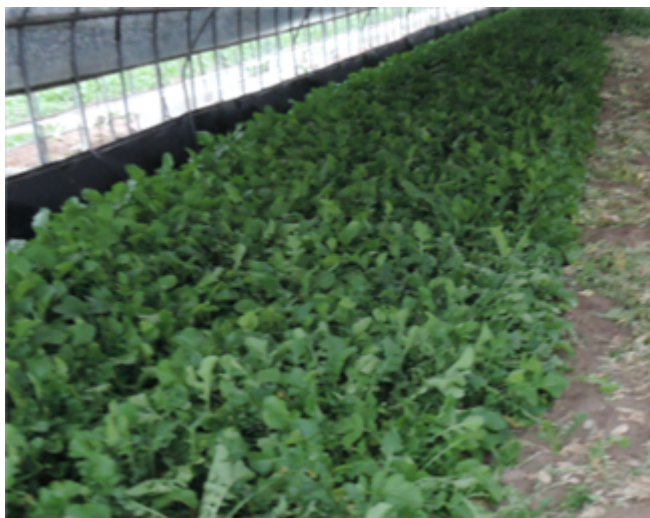

**Figure S1.** Sowing radish for field test

Before and 3 days and 7 days after compound **1** treatment, live larvae of diamondback moth were investigated within 20 m<sup>2</sup> by randomly. Larvicidal activity was calculated by the equation:  $[100 - (\text{average of larvae viability} / \text{average of non-treated larvae viability} \times 100)]$  (Abbott, 1925).

**Table S4.** Larvicidal activity against diamondback moth (after 3 days)

| Entry | Compd                           | Concentration (ppm) | Average density (m <sup>2</sup> ) | Larvae Viability (%) |       |       |         | Larvicidal activity (%) |
|-------|---------------------------------|---------------------|-----------------------------------|----------------------|-------|-------|---------|-------------------------|
|       |                                 |                     |                                   | 1                    | 2     | 3     | average |                         |
| 1     | <i>N</i> -Cyano sulfilimine (1) | 50                  | 31.7                              | 9.7                  | 13.8  | 8.6   | 10.7    | 90.4                    |
| 2     | <b>Chlorantraniliprole</b>      | 25                  | 40.7                              | 7.5                  | 12.1  | 6.1   | 8.6     | 92.3                    |
| 3     | <b>Non-treated</b>              | -                   | 33.3                              | 106.1                | 122.6 | 105.6 | 111.4   | -                       |

**Table S5.** Larvicidal activity against diamondback moth (after 7 days)

| Entry | Compd                           | Concentration (ppm) | Average density (m <sup>2</sup> ) | Larvae Viability (%) |       |       |         | Larvicidal activity (%) |
|-------|---------------------------------|---------------------|-----------------------------------|----------------------|-------|-------|---------|-------------------------|
|       |                                 |                     |                                   | 1                    | 2     | 3     | average |                         |
| 1     | <i>N</i> -Cyano sulfilimine (1) | 50                  | 31.7                              | 9.7                  | 13.8  | 8.6   | 10.7    | 90.4                    |
| 2     | <b>Chlorantraniliprole</b>      | 25                  | 40.7                              | 7.5                  | 12.1  | 6.1   | 8.6     | 92.3                    |
| 3     | <b>Non-treated</b>              | -                   | 33.3                              | 106.1                | 122.6 | 105.6 | 111.4   | -                       |

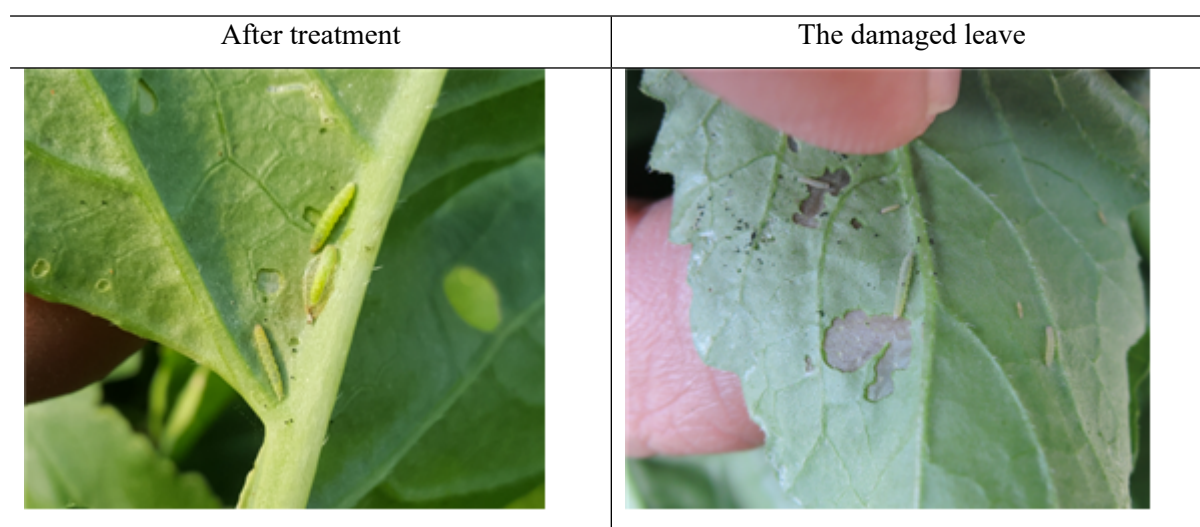

**Figure S2.** Field test against diamondback moth

## Against *Spodoptera litura*

The open-field test was conducted with napa cabbage (large heads with firmly packed leaves) at Sannaemyeon, Geoncheon-eup, Gyeongju-si, Gyeongsangbuk-do, South Korea. For the test, in-house raised 2nd instar larvae of diamondback moth were released three per week. Before the treatment of compound **1**, the number of live insects was an average of 29.3 larvae (10 weeks), and it was suitable for the test. Using engine-type power sprayer (ARIMITSU), compound **1** was treated in triplicate in 20 m<sup>2</sup>, and it was repeated three times. The spray volume in compound **1** was 3 liters per 20 m<sup>2</sup>. Compound **1** (10% WP) was diluted 4,000-fold in water and treated at concentrations of 25 ppm. For the reference, chlorantraniliprole 5% WG (Farm Hannong, Altacore) was diluted 2,000 times and treated with 25ppm.

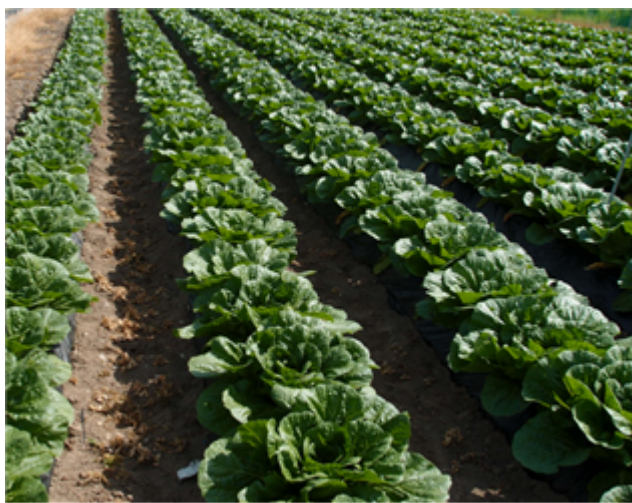

**Figure S3.** Napa cabbage for field test

Before and 3 days and 7 days after compound **1** treatment, live larvae of *Spodoptera litura* were investigated within 20 m<sup>2</sup> by randomly. Larvicidal activity was calculated by the equation:  $[100 - (\text{average of larvae viability} / \text{average of non-treated larvae viability} \times 100)]$  (Abbott, 1925).

**Table S6.** Larvicidal activity against *Spodoptera litura* (after 3 days)

| Entry | Compd                           | Concentration (ppm) | Average density (m <sup>2</sup> ) | Larvae Viability (%) |       |       |         | Larvicidal activity (%) |
|-------|---------------------------------|---------------------|-----------------------------------|----------------------|-------|-------|---------|-------------------------|
|       |                                 |                     |                                   | 1                    | 2     | 3     | average |                         |
| 1     | <i>N</i> -Cyano sulfilimine (1) | 50                  | 31.7                              | 14.3                 | 32.0  | 22.9  | 23.1    | 81.2                    |
| 2     | <b>Chlorantraniliprole</b>      | 25                  | 34.0                              | 22.9                 | 28.1  | 25.7  | 25.6    | 79.2                    |
| 3     | <b>Non-treated</b>              | -                   | 29.3                              | 121.4                | 116.1 | 131.0 | 122.8   | -                       |

**Table S7.** Larvicidal activity against *Spodoptera litura* (after 7 days)

| Entry | Compd                           | Concentration (ppm) | Average density (m <sup>2</sup> ) | Larvae Viability (%) |       |       |         | Larvicidal activity (%) |
|-------|---------------------------------|---------------------|-----------------------------------|----------------------|-------|-------|---------|-------------------------|
|       |                                 |                     |                                   | 1                    | 2     | 3     | average |                         |
| 1     | <i>N</i> -Cyano sulfilimine (1) | 50                  | 31.7                              | 14.3                 | 20.0  | 17.1  | 17.1    | 86.8                    |
| 2     | <b>Chlorantraniliprole</b>      | 25                  | 34.0                              | 22.9                 | 21.9  | 20.0  | 21.6    | 83.3                    |
| 3     | <b>Non-treated</b>              | -                   | 29.3                              | 128.6                | 122.6 | 137.9 | 129.7   | -                       |

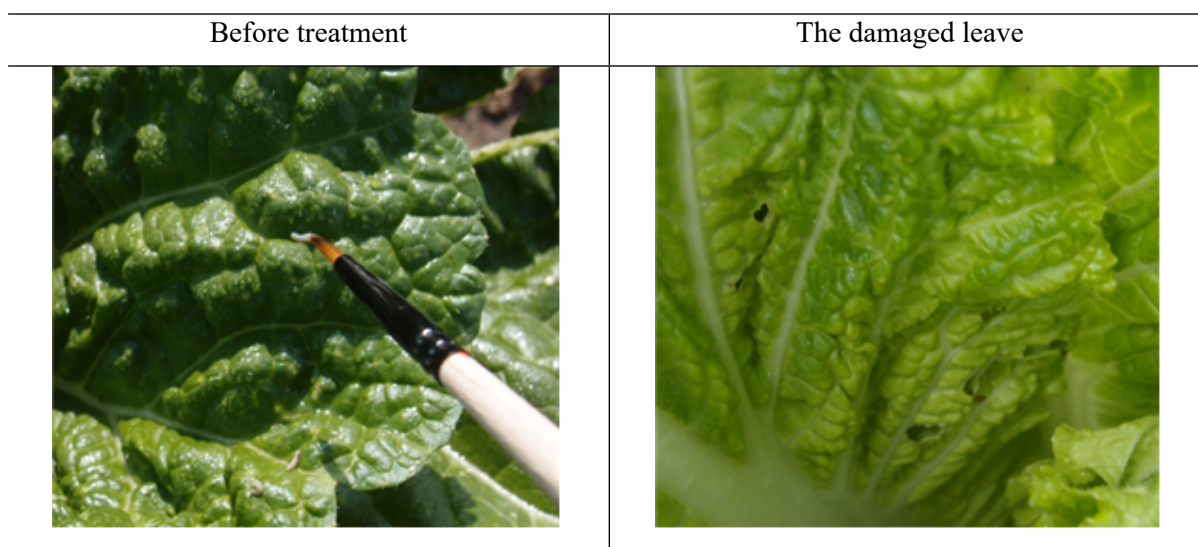**Figure S4.** Field test against *Spodoptera litura*

# pH-metric pKa of compound 1

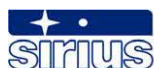

pH-metric

Sample name: **KI-02307** Experiment start time: **16/06/2021 21:11:24**  
 Assay name: **pH-metric pKa** Analyst:  
 Assay ID: **21F-16020** Instrument ID: **T313101**  
 Filename: **D:\Data\Customer\21F-16020\_KI-02307\_pH-metric pKa.t3r**

## Overall results

RMSD 0.218  
 Average ionic strength 0.159 M  
 Average temperature 25.0°C  
 Analyte concentration range 1645.3 µM to 1766.7 µM  
 Total points considered 35 of 48

## Warnings and errors

Errors None  
 Warnings Turbidity threshold has been exceeded  
 Turbid points included in calculation

## Four-Plus parameters

Alpha 0.071 16/06/2021 21:11:24 D:\Data\Customer\21F-16008\_Blank standardisation.t3r  
 S 1.0002 16/06/2021 21:11:24 D:\Data\Customer\21F-16008\_Blank standardisation.t3r  
 jH 0.7 16/06/2021 21:11:24 D:\Data\Customer\21F-16008\_Blank standardisation.t3r  
 jOH -0.5 16/06/2021 21:11:24 D:\Data\Customer\21F-16008\_Blank standardisation.t3r

## Titrants

0.50 M HCl 0.993077 16/06/2021 21:11:24 D:\Data\Customer\21F-16010\_Blank standardisation.t3r  
 0.50 M KOH 0.993673 16/06/2021 21:11:24 D:\Data\Customer\21E-27008\_KHP\_Base standardisation using KHP.t3r

## Sample

KI-02307 concentration factor 1.078  
 Acid pKa 1 8.44

## Sample graphs

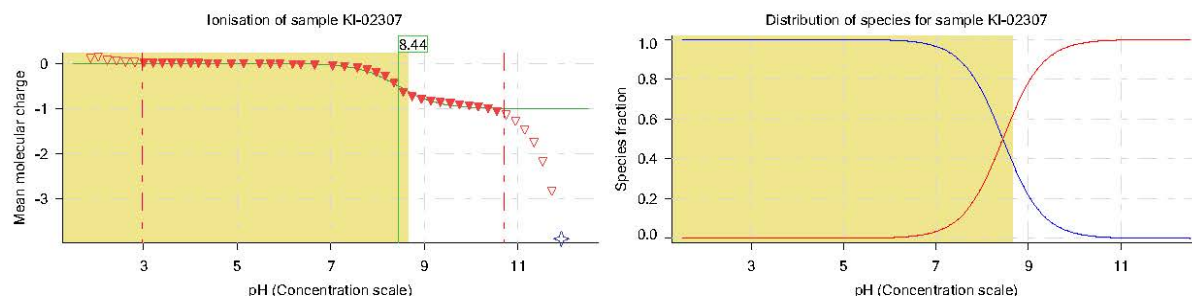

## Sample species percents

| pH     | KI-02307  | KI-02307 | Comment    |
|--------|-----------|----------|------------|
|        | KI-02307H | KI-02307 |            |
| 1.000  | 100.00 %  | 0.00 %   |            |
| 1.200  | 100.00 %  | 0.00 %   | Stomach pH |
| 2.000  | 100.00 %  | 0.00 %   |            |
| 3.000  | 100.00 %  | 0.00 %   |            |
| 4.000  | 100.00 %  | 0.00 %   |            |
| 5.000  | 99.96 %   | 0.04 %   |            |
| 6.000  | 99.64 %   | 0.36 %   |            |
| 6.500  | 98.87 %   | 1.13 %   |            |
| 7.000  | 96.51 %   | 3.49 %   |            |
| 7.400  | 91.67 %   | 8.33 %   | Blood pH   |
| 8.000  | 73.44 %   | 26.56 %  |            |
| 9.000  | 21.66 %   | 78.34 %  |            |
| 10.000 | 2.69 %    | 97.31 %  |            |
| 11.000 | 0.28 %    | 99.72 %  |            |
| 12.000 | 0.03 %    | 99.97 %  |            |



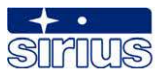

pH-metric

Sample name: KI-02307  
Assay name: pH-metric pKa  
Assay ID: 21F-16020  
Filename: D:\Data\Customer\21F-16020\_KI-02307\_pH-metric pKa.t3r

Experiment start time: 16/06/2021 21:11:24  
Analyst:  
Instrument ID: T313101

Carbonate and acidity

- Carbonate 0.075 mM
- Acidity error -0.103 mM

Other graphs

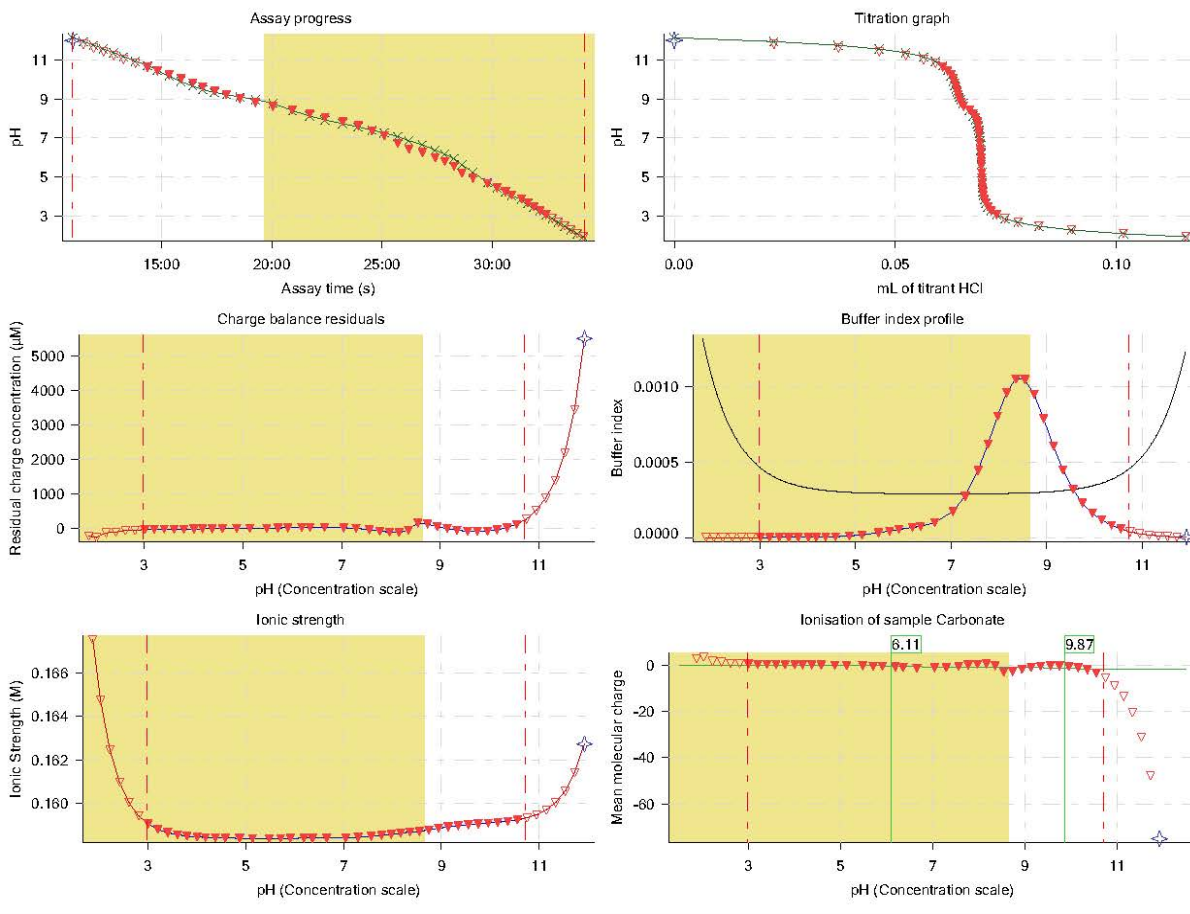

# pH-metric pKa of compound 7

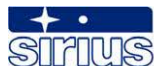

pH-metric

Sample name: **KI-02306** Experiment start time: **16/06/2021 20:02:06**  
 Assay name: **pH-metric pKa** Analyst:  
 Assay ID: **21F-16018** Instrument ID: **T313101**  
 Filename: **D:\Data\Customer\21F-16018\_KI-02306\_pH-metric pKa.t3r**

## Overall results

RMSD 0.127  
 Average ionic strength 0.158 M  
 Average temperature 25.0°C  
 Analyte concentration range 1521.7 µM to 1626.6 µM  
 Total points considered 35 of 47

## Warnings and errors

Errors None  
 Warnings Sample concentration factor out of range

## Four-Plus parameters

Alpha 0.071 16/06/2021 20:02:06 D:\Data\Customer\21F-16008\_Blank standardisation.t3r  
 S 1.0002 16/06/2021 20:02:06 D:\Data\Customer\21F-16008\_Blank standardisation.t3r  
 jH 0.7 16/06/2021 20:02:06 D:\Data\Customer\21F-16008\_Blank standardisation.t3r  
 jOH -0.5 16/06/2021 20:02:06 D:\Data\Customer\21F-16008\_Blank standardisation.t3r

## Titrants

0.50 M HCl 0.993077 16/06/2021 20:02:06 D:\Data\Customer\21F-16010\_Blank standardisation.t3r  
 0.50 M KOH 0.993673 16/06/2021 20:02:06 D:\Data\Customer\21E-27008\_KHP\_Base standardisation using KHP.t3r

## Sample

KI-02306 concentration factor 0.491  
 Acid pKa 1 8.90

## Sample graphs

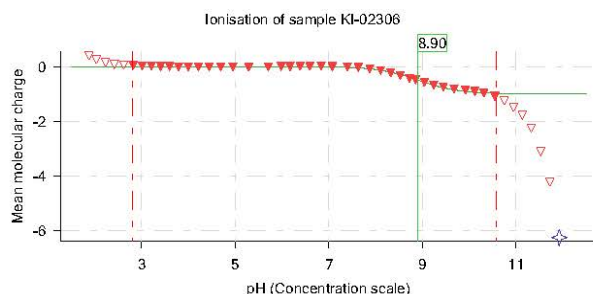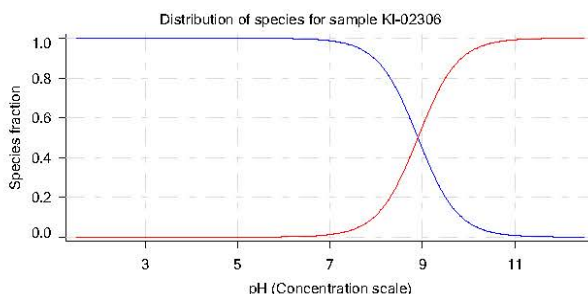

## Sample species percents

| pH     | KI-02306 | KI-02306H | KI-02306 | Comment    |
|--------|----------|-----------|----------|------------|
| 1.000  | 100.00 % | 0.00 %    |          |            |
| 1.200  | 100.00 % | 0.00 %    |          | Stomach pH |
| 2.000  | 100.00 % | 0.00 %    |          |            |
| 3.000  | 100.00 % | 0.00 %    |          |            |
| 4.000  | 100.00 % | 0.00 %    |          |            |
| 5.000  | 99.99 %  | 0.01 %    |          |            |
| 6.000  | 99.87 %  | 0.13 %    |          |            |
| 6.500  | 99.60 %  | 0.40 %    |          |            |
| 7.000  | 98.75 %  | 1.25 %    |          |            |
| 7.400  | 96.92 %  | 3.08 %    |          | Blood pH   |
| 8.000  | 88.78 %  | 11.22 %   |          |            |
| 9.000  | 44.18 %  | 55.82 %   |          |            |
| 10.000 | 7.33 %   | 92.67 %   |          |            |
| 11.000 | 0.79 %   | 99.21 %   |          |            |
| 12.000 | 0.08 %   | 99.92 %   |          |            |



pH-metric

Sample name: KI-02306  
Assay name: pH-metric pKa  
Assay ID: 21F-16018  
Filename: D:\Data\Customer\21F-16018\_KI-02306\_pH-metric pKa.t3r

Experiment start time: 16/06/2021 20:02:06  
Analyst:  
Instrument ID: T313101

Carbonate and acidity

- Carbonate 0.146 mM
- Acidity error -0.114 mM

Other graphs

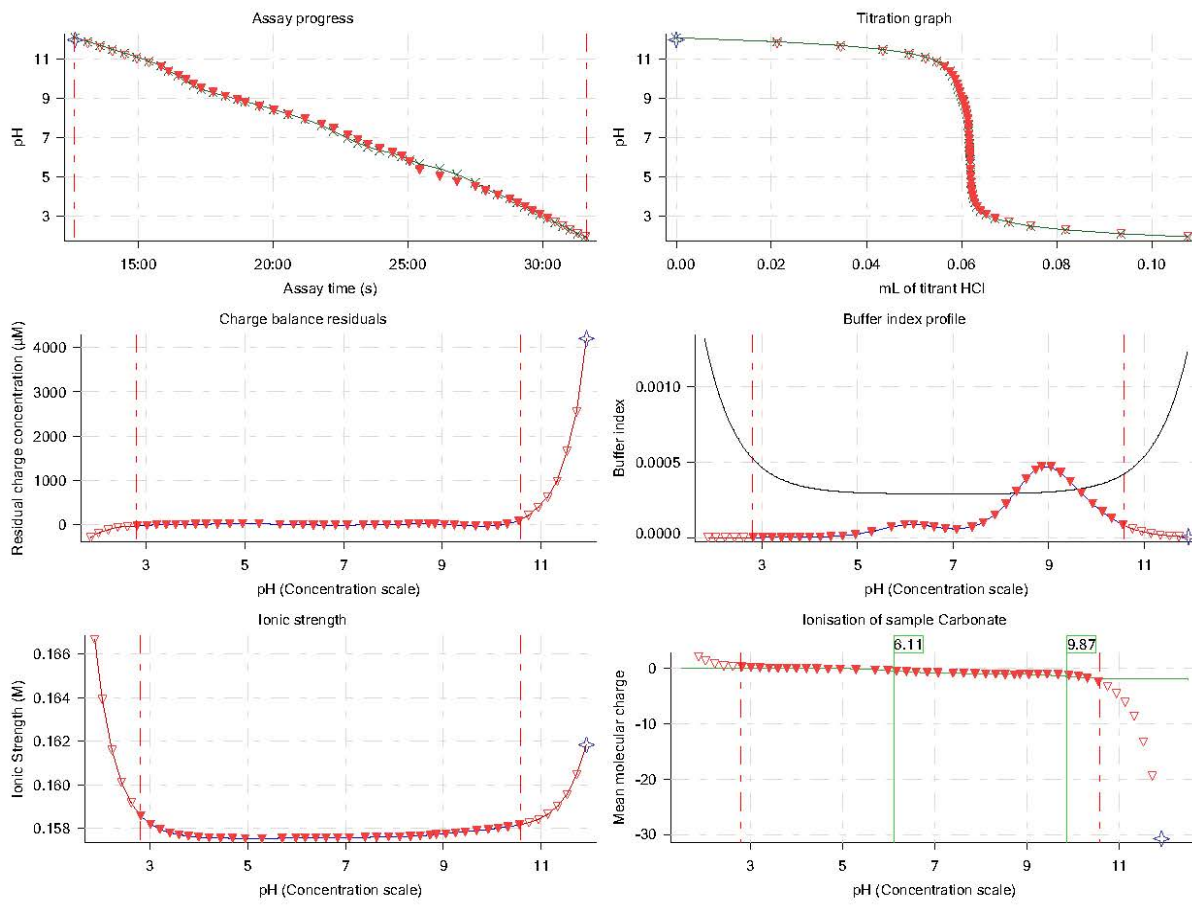

# pH-metric pKa of compound 8



pH-metric

Sample name: **KI-02308** Experiment start time: **16/06/2021 23:01:26**  
 Assay name: **pH-metric pKa** Analyst:  
 Assay ID: **21F-16023** Instrument ID: **T313101**  
 Filename: **D:\Data\Customer\21F-16023\_KI-02308\_pH-metric pKa.t3r**

## Overall results

RMSD 0.177  
 Average ionic strength 0.159 M  
 Average temperature 25.0°C  
 Analyte concentration range 1673.3 µM to 1800.8 µM  
 Total points considered 33 of 47

## Warnings and errors

Errors None  
 Warnings Turbidity threshold has been exceeded  
 Sample concentration factor out of range  
 Turbid points included in calculation

## Four-Plus parameters

Alpha 0.071 16/06/2021 23:01:26 D:\Data\Customer\21F-16008\_Blank standardisation.t3r  
 S 1.0002 16/06/2021 23:01:26 D:\Data\Customer\21F-16008\_Blank standardisation.t3r  
 jH 0.7 16/06/2021 23:01:26 D:\Data\Customer\21F-16008\_Blank standardisation.t3r  
 jOH -0.5 16/06/2021 23:01:26 D:\Data\Customer\21F-16008\_Blank standardisation.t3r

## Titrants

0.50 M HCl 0.993077 16/06/2021 23:01:26 D:\Data\Customer\21F-16010\_Blank standardisation.t3r  
 0.50 M KOH 0.993673 16/06/2021 23:01:26 D:\Data\Customer\21E-27008\_KHP\_Base standardisation using KHP.t3r

## Sample

KI-02308 concentration factor 0.621  
 Acid pKa 1 8.95

## Sample graphs

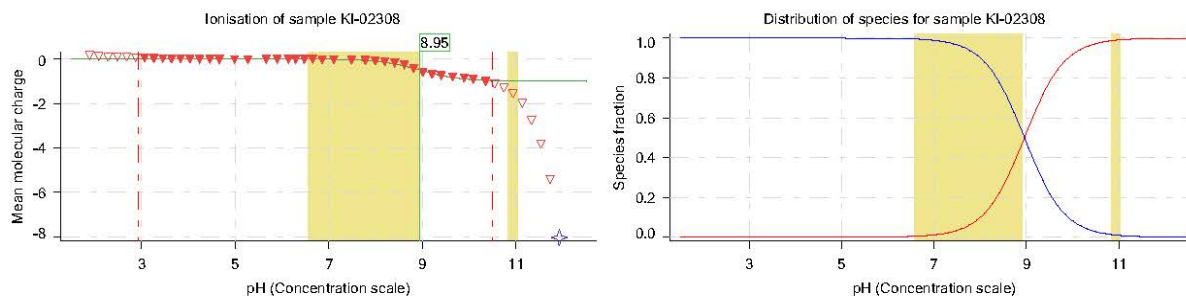

## Sample species percents

| pH     | KI-02308  |          | Comment    |
|--------|-----------|----------|------------|
|        | KI-02308H | KI-02308 |            |
| 1.000  | 100.00 %  | 0.00 %   |            |
| 1.200  | 100.00 %  | 0.00 %   | Stomach pH |
| 2.000  | 100.00 %  | 0.00 %   |            |
| 3.000  | 100.00 %  | 0.00 %   |            |
| 4.000  | 100.00 %  | 0.00 %   |            |
| 5.000  | 99.99 %   | 0.01 %   |            |
| 6.000  | 99.89 %   | 0.11 %   |            |
| 6.500  | 99.65 %   | 0.35 %   |            |
| 7.000  | 98.90 %   | 1.10 %   |            |
| 7.400  | 97.28 %   | 2.72 %   | Blood pH   |
| 8.000  | 89.97 %   | 10.03 %  |            |
| 9.000  | 47.29 %   | 52.71 %  |            |
| 10.000 | 8.23 %    | 91.77 %  |            |
| 11.000 | 0.89 %    | 99.11 %  |            |
| 12.000 | 0.09 %    | 99.91 %  |            |



pH-metric

Sample name: KI-02308  
Assay name: pH-metric pKa  
Assay ID: 21F-16023  
Filename: D:\Data\Customer\21F-16023\_KI-02308\_pH-metric pKa.t3r

Experiment start time: 16/06/2021 23:01:26  
Analyst:  
Instrument ID: T313101

Carbonate and acidity

- Carbonate 0.132 mM
- Acidity error -0.108 mM

Other graphs

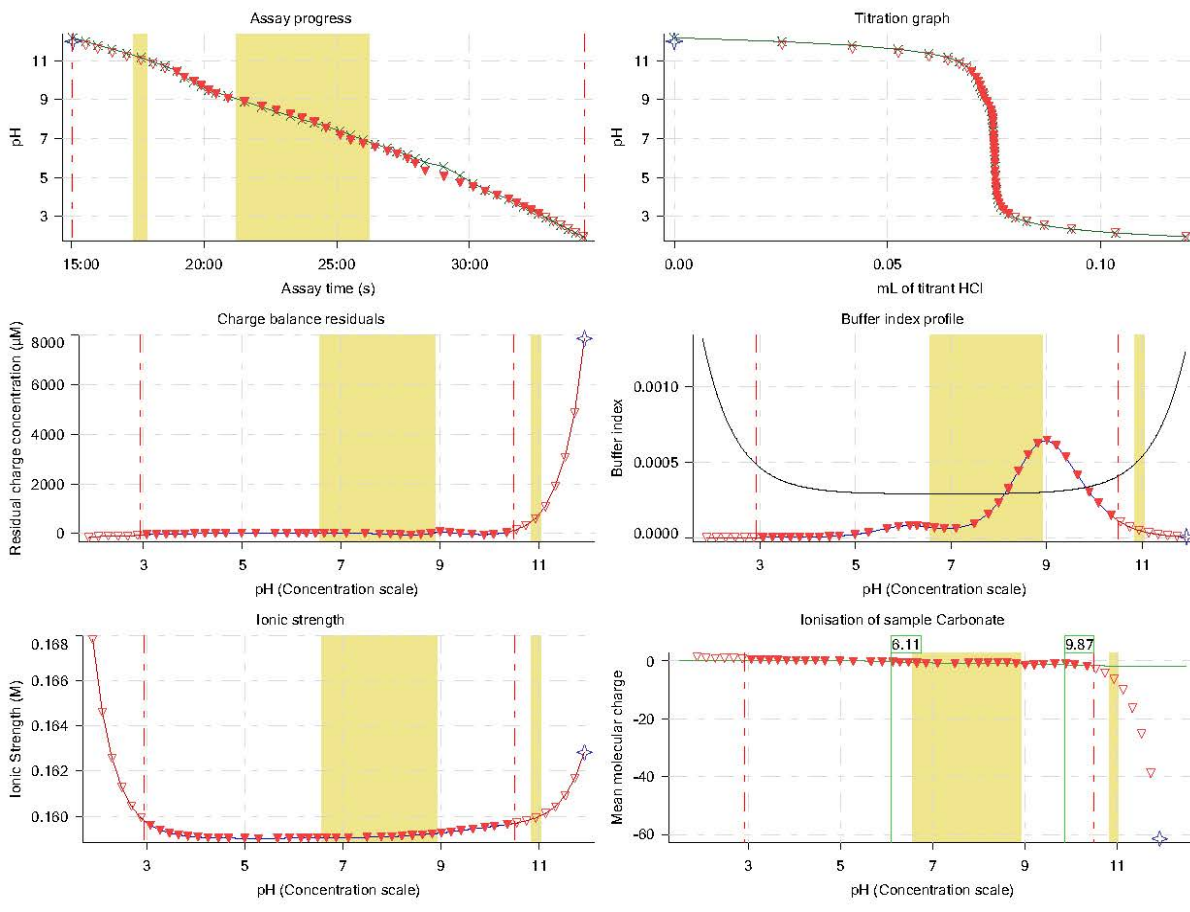

# pH-metric pKa of compound 9



pH-metric

Sample name: **KI-2312** Experiment start time: **17/06/2021 01:34:36**  
 Assay name: **pH-metric pKa** Analyst:  
 Assay ID: **21F-17003** Instrument ID: **T313101**  
 Filename: **D:\Data\Customer\21F-17003\_KI-2312\_pH-metric pKa.t3r**

## Overall results

RMSD 0.173  
 Average ionic strength 0.159 M  
 Average temperature 25.0°C  
 Analyte concentration range 1672.6 µM to 1797.6 µM  
 Total points considered 35 of 49

## Warnings and errors

Errors None  
 Warnings Turbidity threshold has been exceeded  
 Turbid points included in calculation

## Four-Plus parameters

Alpha 0.071 17/06/2021 01:34:36 D:\Data\Customer\21F-16008\_Blank standardisation.t3r  
 S 1.0002 17/06/2021 01:34:36 D:\Data\Customer\21F-16008\_Blank standardisation.t3r  
 jH 0.7 17/06/2021 01:34:36 D:\Data\Customer\21F-16008\_Blank standardisation.t3r  
 jOH -0.5 17/06/2021 01:34:36 D:\Data\Customer\21F-16008\_Blank standardisation.t3r

## Titrants

0.50 M HCl 0.993077 17/06/2021 01:34:36 D:\Data\Customer\21F-16010\_Blank standardisation.t3r  
 0.50 M KOH 0.993673 17/06/2021 01:34:36 D:\Data\Customer\21E-27008\_KHP\_Base standardisation using KHP.t3r

## Sample

KI-2312 concentration factor 0.742  
 Acid pKa 1 8.15

## Sample graphs

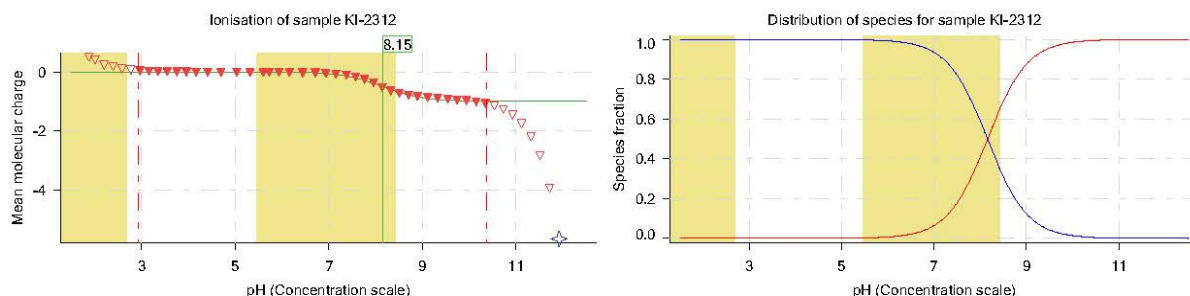

## Sample species percents

| pH     | KI-2312  | KI-2312 | Comment    |
|--------|----------|---------|------------|
|        | KI-2312H | KI-2312 |            |
| 1.000  | 100.00 % | 0.00 %  |            |
| 1.200  | 100.00 % | 0.00 %  | Stomach pH |
| 2.000  | 100.00 % | 0.00 %  |            |
| 3.000  | 100.00 % | 0.00 %  |            |
| 4.000  | 99.99 %  | 0.01 %  |            |
| 5.000  | 99.93 %  | 0.07 %  |            |
| 6.000  | 99.30 %  | 0.70 %  |            |
| 6.500  | 97.83 %  | 2.17 %  |            |
| 7.000  | 93.46 %  | 6.54 %  |            |
| 7.400  | 85.05 %  | 14.95 % | Blood pH   |
| 8.000  | 58.83 %  | 41.17 % |            |
| 9.000  | 12.50 %  | 87.50 % |            |
| 10.000 | 1.41 %   | 98.59 % |            |
| 11.000 | 0.14 %   | 99.86 % |            |
| 12.000 | 0.01 %   | 99.99 % |            |



pH-metric

Sample name: KI-2312  
Assay name: pH-metric pKa  
Assay ID: 21F-17003  
Filename: D:\Data\Customer\21F-17003\_KI-2312\_pH-metric pKa.t3r

Experiment start time: 17/06/2021 01:34:36  
Analyst:  
Instrument ID: T313101

Carbonate and acidity

- Carbonate 0.137 mM
- Acidity error -0.286 mM

Other graphs

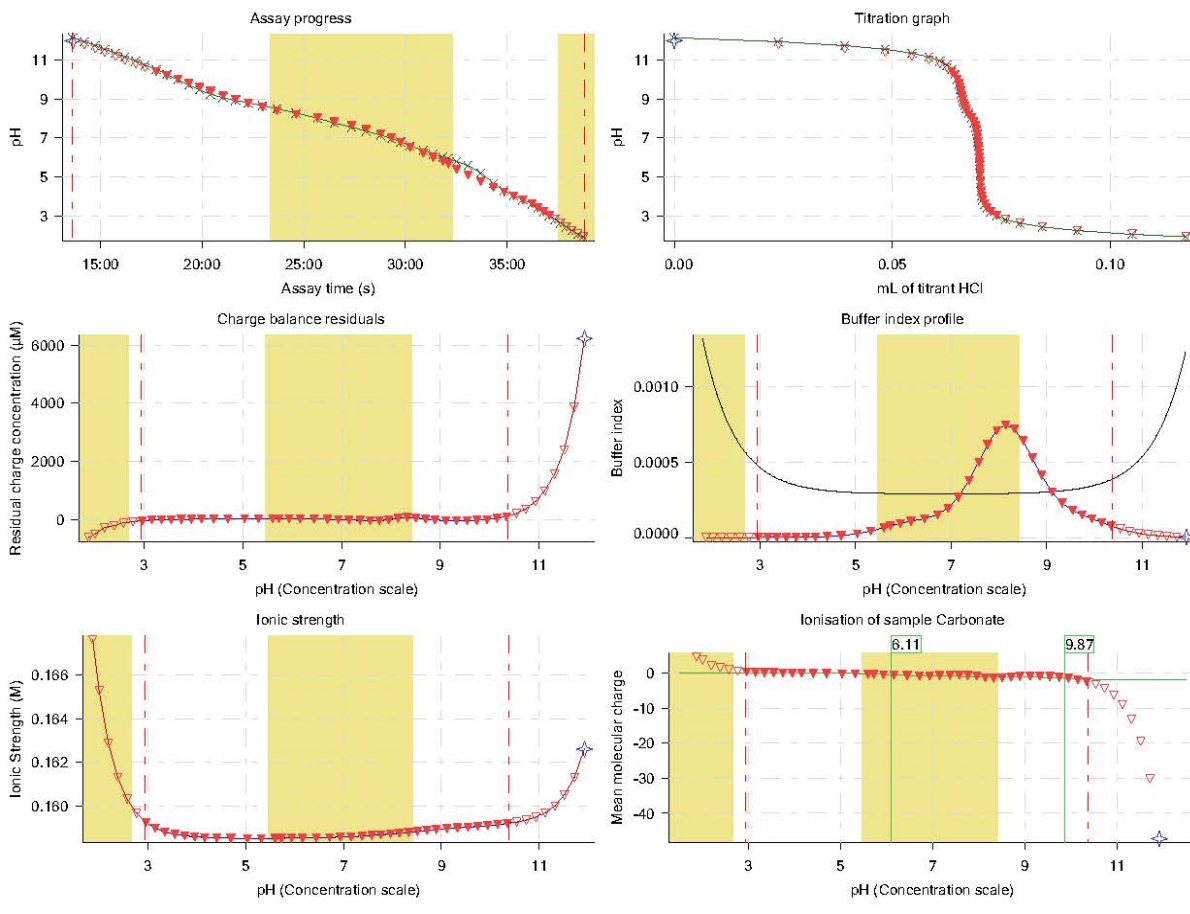

# pH-metric pKa of Chlorantraniliprole



pH-metric

Sample name: **Reference 1** Experiment start time: **25/08/2021 10:48:28**  
 Assay name: **pH-metric pKa** Analyst:  
 Assay ID: **21H-25007** Instrument ID: **T313101**  
 Filename: **D:\Data\Customer\21H-25007\_Reference 1\_pH-metric pKa.t3r**

## Overall results

RMSD 0.052  
 Average ionic strength 0.157 M  
 Average temperature 25.0°C  
 Analyte concentration range 2092.5 µM to 2232.9 µM  
 Total points considered 26 of 38

## Warnings and errors

Errors None  
 Warnings Sample concentration factor out of range

## Four-Plus parameters

Alpha 0.080 25/08/2021 10:48:28 D:\Data\Customer\21H-25005\_Blank standardisation.t3r  
 S 0.9949 25/08/2021 10:48:28 D:\Data\Customer\21H-25005\_Blank standardisation.t3r  
 jH 2.2 25/08/2021 10:48:28 D:\Data\Customer\21H-25005\_Blank standardisation.t3r  
 jOH -0.6 25/08/2021 10:48:28 D:\Data\Customer\21H-25005\_Blank standardisation.t3r

## Titrants

0.50 M HCl 0.978024 25/08/2021 10:48:28 D:\Data\Customer\21H-25005\_Blank standardisation.t3r  
 0.50 M KOH 0.993673 25/08/2021 10:48:28 D:\Data\Customer\21E-27008\_KHP\_Base standardisation using KHP.t3r

## Sample

Reference 1 concentration factor 0.117  
 Base pKa 1 1.52  
 Acid pKa 2 10.77

## Sample graphs

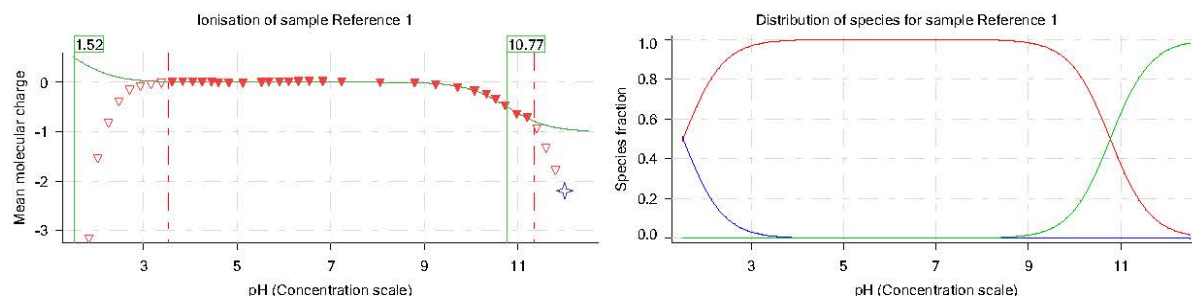

## Sample species percents

| pH     | Reference 1<br>Reference 1H2 | Reference 1<br>Reference 1H | Reference 1<br>Reference 1 | Comment    |
|--------|------------------------------|-----------------------------|----------------------------|------------|
| 1.000  | 76.78 %                      | 23.22 %                     | 0.00 %                     |            |
| 1.200  | 67.60 %                      | 32.40 %                     | 0.00 %                     | Stomach pH |
| 2.000  | 24.85 %                      | 75.15 %                     | 0.00 %                     |            |
| 3.000  | 3.20 %                       | 96.80 %                     | 0.00 %                     |            |
| 4.000  | 0.33 %                       | 99.67 %                     | 0.00 %                     |            |
| 5.000  | 0.03 %                       | 99.97 %                     | 0.00 %                     |            |
| 6.000  | 0.00 %                       | 99.99 %                     | 0.00 %                     |            |
| 6.500  | 0.00 %                       | 99.99 %                     | 0.01 %                     |            |
| 7.000  | 0.00 %                       | 99.98 %                     | 0.02 %                     |            |
| 7.400  | 0.00 %                       | 99.96 %                     | 0.04 %                     | Blood pH   |
| 8.000  | 0.00 %                       | 99.83 %                     | 0.17 %                     |            |
| 9.000  | 0.00 %                       | 98.32 %                     | 1.68 %                     |            |
| 10.000 | 0.00 %                       | 85.43 %                     | 14.57 %                    |            |
| 11.000 | 0.00 %                       | 36.97 %                     | 63.03 %                    |            |
| 12.000 | 0.00 %                       | 5.54 %                      | 94.46 %                    |            |





pH-metric

Sample name: Reference 1  
Assay name: pH-metric pKa  
Assay ID: 21H-25007  
Filename: D:\Data\Customer\21H-25007\_Reference 1\_pH-metric pKa.t3r

Experiment start time: 25/08/2021 10:48:28  
Analyst:  
Instrument ID: T313101

Carbonate and acidity

- Carbonate 0.127 mM
- Acidity error 0.232 mM

Other graphs

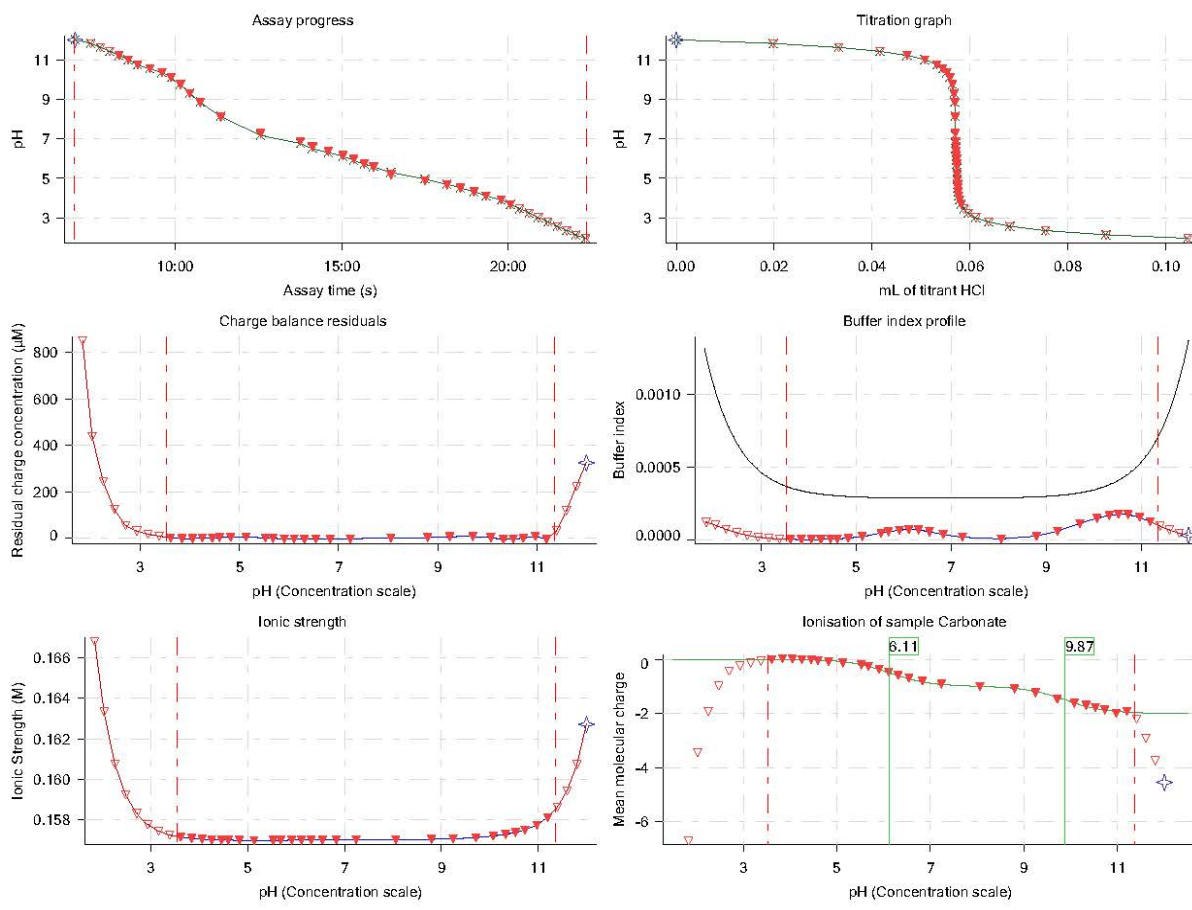

# pH-metric Log P of compound 1

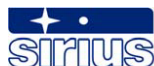

pH-metric

Sample name: **KI-02307** Experiment start time: **12/12/2016 15:40:13**  
Assay name: **pH-metric medium logP** Analyst: **KRICT**  
Assay ID: **16L-12013** Instrument ID: **T313101**  
Filename: **D:\Data\Customer\16L-12013\_KI-02307\_pH-metric medium logP.t3r**

## Overall results

RMSD 0.181  
Average ionic strength 0.158 M  
Average temperature 25.0°C  
Partition ratio 0.2805 : 1  
Analyte concentration range 2260.7 µM to 2382.0 µM  
Total points considered 34 of 43

## Warnings and errors

Errors None  
Warnings Sample concentration factor out of range  
Excessive carbonate concentration present

## Four-Plus parameters

Alpha 0.140 12/12/2016 15:40:13 D:\Data\Customer\16L-12010\_Blank standardisation.t3r  
S 0.9968 12/12/2016 15:40:13 D:\Data\Customer\16L-12010\_Blank standardisation.t3r  
jH 1.8 12/12/2016 15:40:13 D:\Data\Customer\16L-12010\_Blank standardisation.t3r  
jOH -1.4 12/12/2016 15:40:13 D:\Data\Customer\16L-12010\_Blank standardisation.t3r

## Titrants

0.50 M HCl 0.985972 12/12/2016 15:40:13 D:\Data\Customer\16L-12010\_Blank standardisation.t3r  
0.50 M KOH 1.005790 12/12/2016 15:40:13 D:\Data\Customer\16J-20009\_KHP\_Base standardisation using KHP.t3r

## Sample

KI-02307 concentration factor 0.460  
Base pKa 1 8.80  
Acid pKa 2 12.10  
logP (XH<sub>2</sub><sup>+</sup>) 4.42  
logP (neutral XH) 3.37  
logP (X<sup>-</sup>) 3.31

## Sample graphs

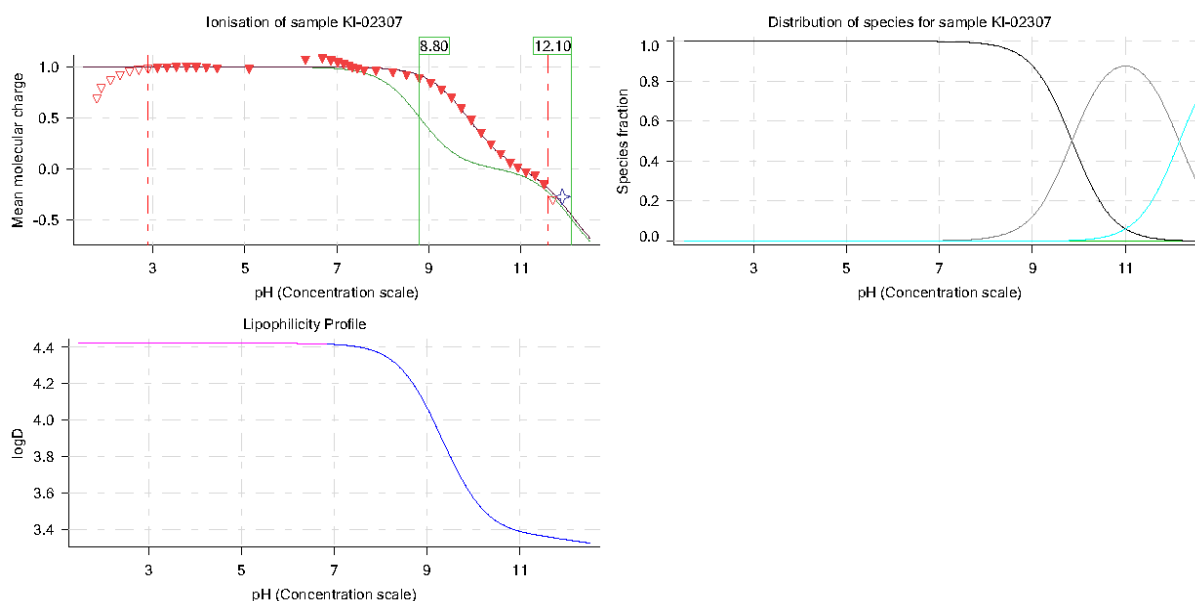

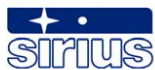

pH-metric

Sample name: **KI-02307** Experiment start time: **12/12/2016 15:40:13**  
 Assay name: **pH-metric medium logP** Analyst: **KRICT**  
 Assay ID: **16L-12013** Instrument ID: **T313101**  
 Filename: **D:\Data\Customer\16L-12013\_KI-02307\_pH-metric medium logP.t3r**

Sample logD and percent species

| pH     | KI-02307<br>logD | KI-02307<br>KI-02307H2 | KI-02307<br>KI-02307H | KI-02307<br>KI-02307 | KI-02307<br>KI-02307H2* | KI-02307<br>KI-02307H* | KI-02307<br>KI-02307* | Comment    |
|--------|------------------|------------------------|-----------------------|----------------------|-------------------------|------------------------|-----------------------|------------|
| 1.000  | 4.42             | 0.01 %                 | 0.00 %                | 0.00 %               | 99.99 %                 | 0.00 %                 | 0.00 %                |            |
| 1.200  | 4.42             | 0.01 %                 | 0.00 %                | 0.00 %               | 99.99 %                 | 0.00 %                 | 0.00 %                | Stomach pH |
| 2.000  | 4.42             | 0.01 %                 | 0.00 %                | 0.00 %               | 99.99 %                 | 0.00 %                 | 0.00 %                |            |
| 3.000  | 4.42             | 0.01 %                 | 0.00 %                | 0.00 %               | 99.99 %                 | 0.00 %                 | 0.00 %                |            |
| 4.000  | 4.42             | 0.01 %                 | 0.00 %                | 0.00 %               | 99.99 %                 | 0.00 %                 | 0.00 %                |            |
| 5.000  | 4.42             | 0.01 %                 | 0.00 %                | 0.00 %               | 99.99 %                 | 0.00 %                 | 0.00 %                |            |
| 6.000  | 4.42             | 0.01 %                 | 0.00 %                | 0.00 %               | 99.97 %                 | 0.01 %                 | 0.00 %                |            |
| 6.500  | 4.42             | 0.01 %                 | 0.00 %                | 0.00 %               | 99.94 %                 | 0.04 %                 | 0.00 %                |            |
| 7.000  | 4.41             | 0.01 %                 | 0.00 %                | 0.00 %               | 99.85 %                 | 0.14 %                 | 0.00 %                |            |
| 7.400  | 4.40             | 0.01 %                 | 0.00 %                | 0.00 %               | 99.63 %                 | 0.35 %                 | 0.00 %                | Blood pH   |
| 8.000  | 4.36             | 0.01 %                 | 0.00 %                | 0.00 %               | 98.60 %                 | 1.39 %                 | 0.00 %                |            |
| 9.000  | 4.06             | 0.01 %                 | 0.02 %                | 0.00 %               | 87.62 %                 | 12.34 %                | 0.01 %                |            |
| 10.000 | 3.57             | 0.01 %                 | 0.09 %                | 0.00 %               | 41.31 %                 | 58.19 %                | 0.40 %                |            |
| 11.000 | 3.39             | 0.00 %                 | 0.13 %                | 0.01 %               | 6.22 %                  | 87.60 %                | 6.04 %                |            |
| 12.000 | 3.34             | 0.00 %                 | 0.09 %                | 0.07 %               | 0.42 %                  | 58.85 %                | 40.57 %               |            |

Carbonate and acidity

Carbonate 0.677 mM  
 Acidity error 1.954 mM

Other graphs

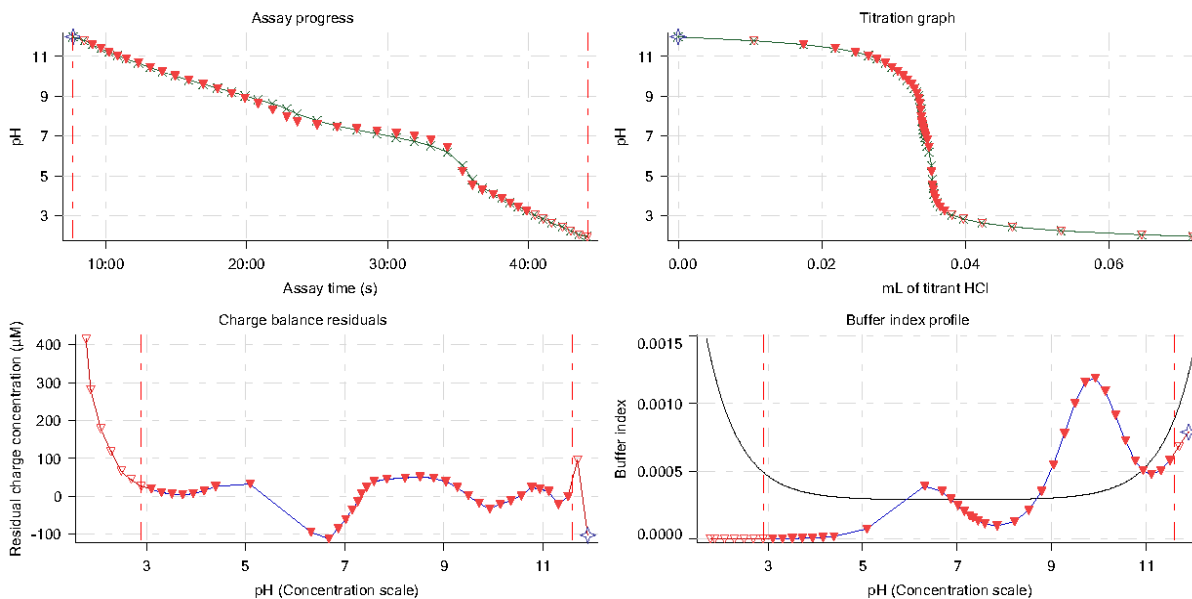



pH-metric

Sample name: KI-02307  
Assay name: pH-metric medium logP  
Assay ID: 16L-12013  
Filename: D:\Data\Customer\16L-12013\_KI-02307\_pH-metric medium logP.t3r

Experiment start time: 12/12/2016 15:40:13  
Analyst: KRICT  
Instrument ID: T313101

Other graphs (continued)

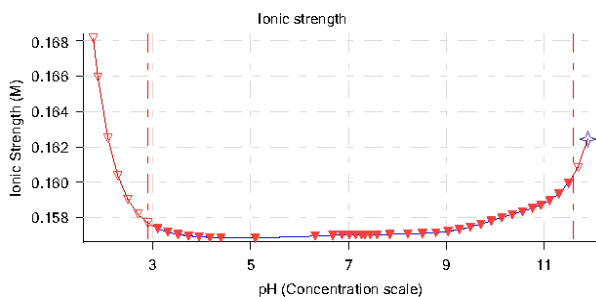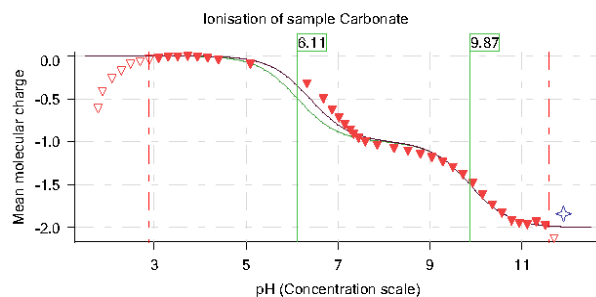

# pH-metric Log P of compound 7

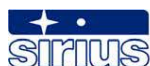

pH-metric

Sample name: **KI-02306** Experiment start time: **6/1/2022 3:41:53 AM**  
Assay name: **pH-metric medium logP** Analyst:  
Assay ID: **22F-01004** Instrument ID: **T313101**  
Filename: **D:\data\customer\22F-01004\_KI-02306\_pH-metric medium logP.t3r**

## Overall results

RMSD 0.348  
Average ionic strength 0.158 M  
Average temperature 25.0°C  
Partition ratio 0.2785 : 1  
Analyte concentration range 2216.1 µM to 2341.2 µM  
Total points considered 36 of 48

## Warnings and errors

Errors None  
Warnings None

## Four-Plus parameters

Alpha 0.182 6/1/2022 3:41:53 AM D:\data\customer\22E-31003\_Blank standardisation.t3r  
S 0.9913 6/1/2022 3:41:53 AM D:\data\customer\22E-31003\_Blank standardisation.t3r  
jH 0.3 6/1/2022 3:41:53 AM D:\data\customer\22E-31003\_Blank standardisation.t3r  
jOH -0.5 6/1/2022 3:41:53 AM D:\data\customer\22E-31003\_Blank standardisation.t3r

## Titrants

0.50 M HCl 0.990757 6/1/2022 3:41:53 AM D:\data\customer\22E-31010\_Blank standardisation.t3r  
0.50 M KOH 1.009850 6/1/2022 3:41:53 AM D:\data\customer\21C-24006\_KHP\_Base standardisation using KHP.t3r

## Sample

KI-02306 concentration factor 0.659  
Acid pKa 1 9.90  
logP (neutral XH) 3.60  
logP (X-) 2.70

## Sample graphs

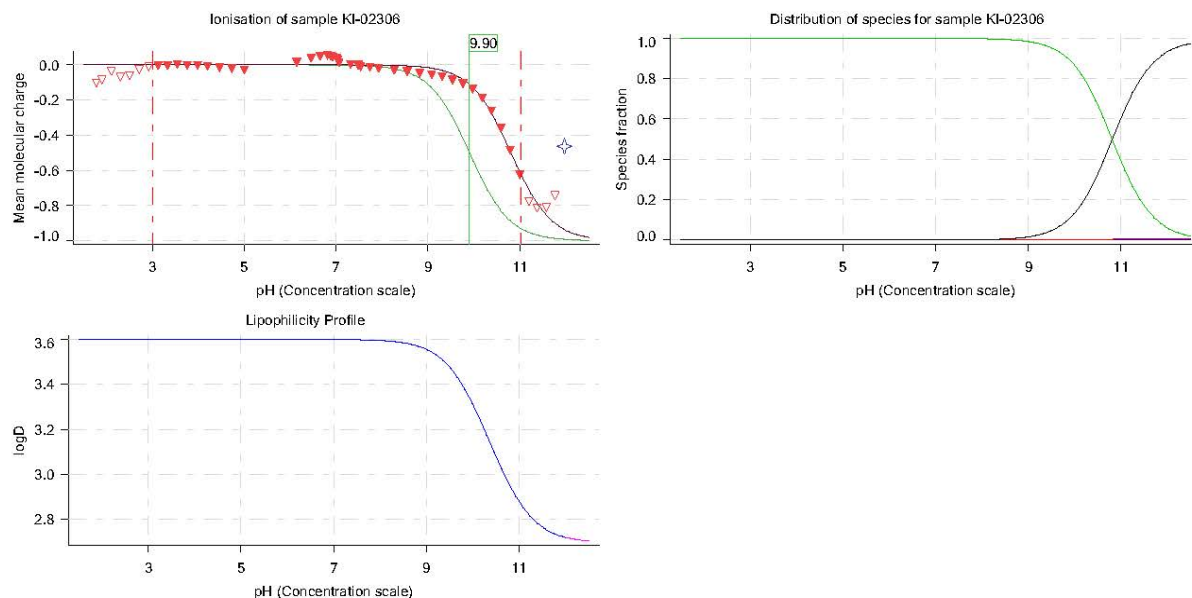

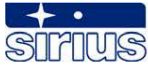

pH-metric

Sample name: KI-02306 Experiment start time: 6/1/2022 3:41:53 AM  
 Assay name: pH-metric medium logP Analyst:  
 Assay ID: 22F-01004 Instrument ID: T313101  
 Filename: D:\data\customer\22F-01004\_KI-02306\_pH-metric medium logP.t3r

Sample logD and percent species

| pH     | KI-02306<br>logD | KI-02306<br>KI-02306H | KI-02306<br>KI-02306 | KI-02306<br>KI-02306H* | KI-02306<br>KI-02306* | Comment    |
|--------|------------------|-----------------------|----------------------|------------------------|-----------------------|------------|
| 1.000  | 3.60             | 0.09 %                | 0.00 %               | 99.91 %                | 0.00 %                |            |
| 1.200  | 3.60             | 0.09 %                | 0.00 %               | 99.91 %                | 0.00 %                | Stomach pH |
| 2.000  | 3.60             | 0.09 %                | 0.00 %               | 99.91 %                | 0.00 %                |            |
| 3.000  | 3.60             | 0.09 %                | 0.00 %               | 99.91 %                | 0.00 %                |            |
| 4.000  | 3.60             | 0.09 %                | 0.00 %               | 99.91 %                | 0.00 %                |            |
| 5.000  | 3.60             | 0.09 %                | 0.00 %               | 99.91 %                | 0.00 %                |            |
| 6.000  | 3.60             | 0.09 %                | 0.00 %               | 99.91 %                | 0.00 %                |            |
| 6.500  | 3.60             | 0.09 %                | 0.00 %               | 99.90 %                | 0.00 %                |            |
| 7.000  | 3.60             | 0.09 %                | 0.00 %               | 99.89 %                | 0.02 %                |            |
| 7.400  | 3.60             | 0.09 %                | 0.00 %               | 99.87 %                | 0.04 %                | Blood pH   |
| 8.000  | 3.60             | 0.09 %                | 0.00 %               | 99.75 %                | 0.16 %                |            |
| 9.000  | 3.56             | 0.09 %                | 0.01 %               | 98.36 %                | 1.54 %                |            |
| 10.000 | 3.31             | 0.08 %                | 0.10 %               | 86.28 %                | 13.55 %               |            |
| 11.000 | 2.88             | 0.03 %                | 0.44 %               | 38.72 %                | 60.80 %               |            |
| 12.000 | 2.72             | 0.01 %                | 0.68 %               | 5.95 %                 | 93.37 %               |            |

Carbonate and acidity

Carbonate 0.500 mM  
 Acidity error 0.395 mM

Other graphs

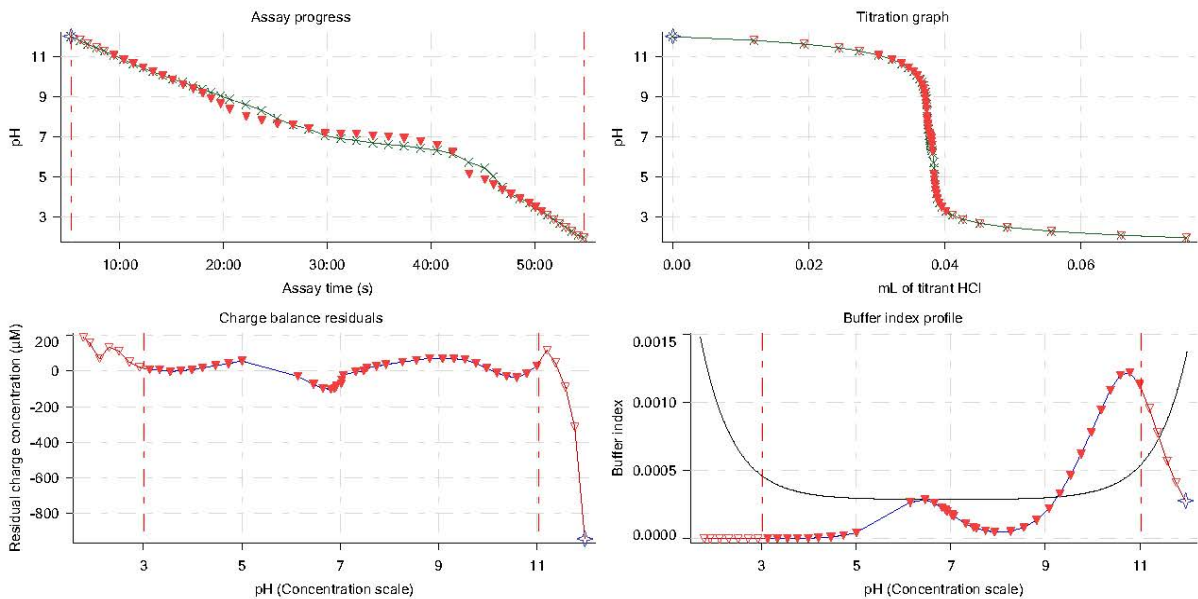

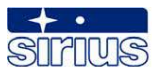

pH-metric

Sample name: KI-02306  
Assay name: pH-metric medium logP  
Assay ID: 22F-01004  
Filename: D:\data\customer\22F-01004\_KI-02306\_pH-metric medium logP.t3r

Experiment start time: 6/1/2022 3:41:53 AM  
Analyst:  
Instrument ID: T313101

Other graphs (continued)

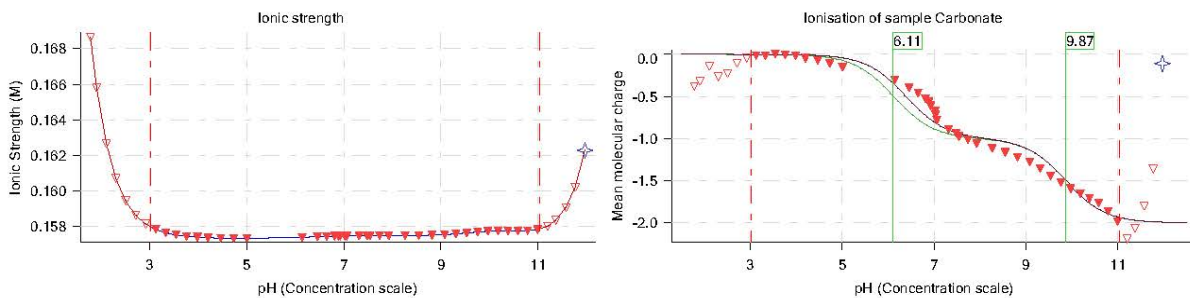

# pH-metric Log P of compound 8

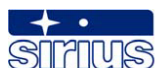

pH-metric

Sample name: **KI-02308** Experiment start time: **12/12/2016 10:21:00**  
Assay name: **pH-metric medium logP** Analyst: **KRICT**  
Assay ID: **16L-12007** Instrument ID: **T313101**  
Filename: **D:\Data\Customer\16L-12007\_KI-02308\_pH-metric medium logP.t3r**

## Overall results

RMSD 0.492  
Average ionic strength 0.158 M  
Average temperature 25.0°C  
Partition ratio 0.2802 : 1  
Analyte concentration range 1831.7 µM to 1928.1 µM  
Total points considered 51 of 57

## Warnings and errors

Errors None  
Warnings Excessive carbonate concentration present

## Four-Plus parameters

Alpha 0.140 12/12/2016 10:21:00 D:\Data\Customer\16L-12005\_Blank standardisation.t3r  
S 0.9969 12/12/2016 10:21:00 D:\Data\Customer\16L-12005\_Blank standardisation.t3r  
jH 2.1 12/12/2016 10:21:00 D:\Data\Customer\16L-12005\_Blank standardisation.t3r  
jOH -1.3 12/12/2016 10:21:00 D:\Data\Customer\16L-12005\_Blank standardisation.t3r

## Titrants

0.50 M HCl 0.992946 12/12/2016 10:21:00 D:\Data\Customer\16L-12005\_Blank standardisation.t3r  
0.50 M KOH 1.005790 12/12/2016 10:21:00 D:\Data\Customer\16J-20009\_KHP\_Base standardisation using KHP.t3r

## Sample

KI-02308 concentration factor 1.172  
Base pKa 1 8.80  
Acid pKa 2 12.10  
logP (XH<sub>2</sub><sup>+</sup>) 7.51  
logP (neutral XH) 4.34  
logP (X<sup>-</sup>) 3.47

## Sample graphs

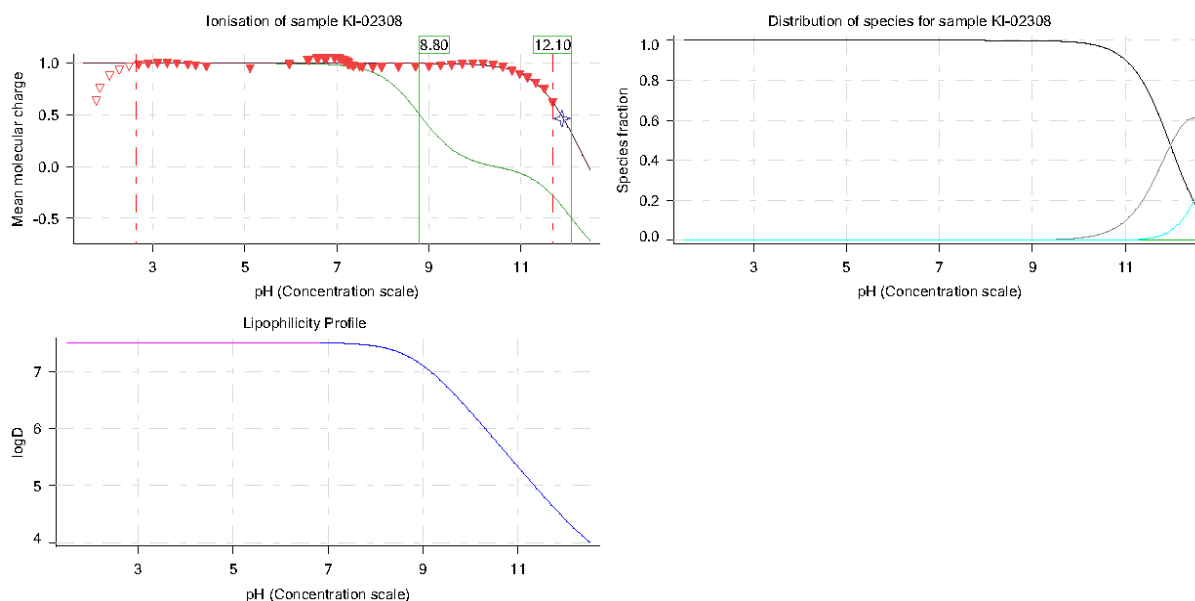





pH-metric

Sample name: **KI-02308** Experiment start time: **12/12/2016 10:21:00**  
 Assay name: **pH-metric medium logP** Analyst: **KRICT**  
 Assay ID: **16L-12007** Instrument ID: **T313101**  
 Filename: **D:\Data\Customer\16L-12007\_KI-02308\_pH-metric medium logP.t3r**

Sample logD and percent species

| pH     | KI-02308 logD | KI-02308 KI-02308H2 | KI-02308 KI-02308H | KI-02308 KI-02308 | KI-02308 KI-02308H2* | KI-02308 KI-02308H* | KI-02308 KI-02308* | Comment    |
|--------|---------------|---------------------|--------------------|-------------------|----------------------|---------------------|--------------------|------------|
| 1.000  | 7.51          | 0.00 %              | 0.00 %             | 0.00 %            | 100.00 %             | 0.00 %              | 0.00 %             |            |
| 1.200  | 7.51          | 0.00 %              | 0.00 %             | 0.00 %            | 100.00 %             | 0.00 %              | 0.00 %             | Stomach pH |
| 2.000  | 7.51          | 0.00 %              | 0.00 %             | 0.00 %            | 100.00 %             | 0.00 %              | 0.00 %             |            |
| 3.000  | 7.51          | 0.00 %              | 0.00 %             | 0.00 %            | 100.00 %             | 0.00 %              | 0.00 %             |            |
| 4.000  | 7.51          | 0.00 %              | 0.00 %             | 0.00 %            | 100.00 %             | 0.00 %              | 0.00 %             |            |
| 5.000  | 7.51          | 0.00 %              | 0.00 %             | 0.00 %            | 100.00 %             | 0.00 %              | 0.00 %             |            |
| 6.000  | 7.51          | 0.00 %              | 0.00 %             | 0.00 %            | 100.00 %             | 0.00 %              | 0.00 %             |            |
| 6.500  | 7.51          | 0.00 %              | 0.00 %             | 0.00 %            | 100.00 %             | 0.00 %              | 0.00 %             |            |
| 7.000  | 7.50          | 0.00 %              | 0.00 %             | 0.00 %            | 100.00 %             | 0.00 %              | 0.00 %             |            |
| 7.400  | 7.49          | 0.00 %              | 0.00 %             | 0.00 %            | 100.00 %             | 0.00 %              | 0.00 %             | Blood pH   |
| 8.000  | 7.45          | 0.00 %              | 0.00 %             | 0.00 %            | 99.99 %              | 0.01 %              | 0.00 %             |            |
| 9.000  | 7.10          | 0.00 %              | 0.00 %             | 0.00 %            | 99.89 %              | 0.11 %              | 0.00 %             |            |
| 10.000 | 6.28          | 0.00 %              | 0.00 %             | 0.00 %            | 98.94 %              | 1.06 %              | 0.00 %             |            |
| 11.000 | 5.32          | 0.00 %              | 0.00 %             | 0.00 %            | 90.22 %              | 9.67 %              | 0.10 %             |            |
| 12.000 | 4.40          | 0.00 %              | 0.01 %             | 0.01 %            | 45.73 %              | 49.04 %             | 5.21 %             |            |

Carbonate and acidity

Carbonate 0.784 mM  
 Acidity error 3.335 mM

Other graphs

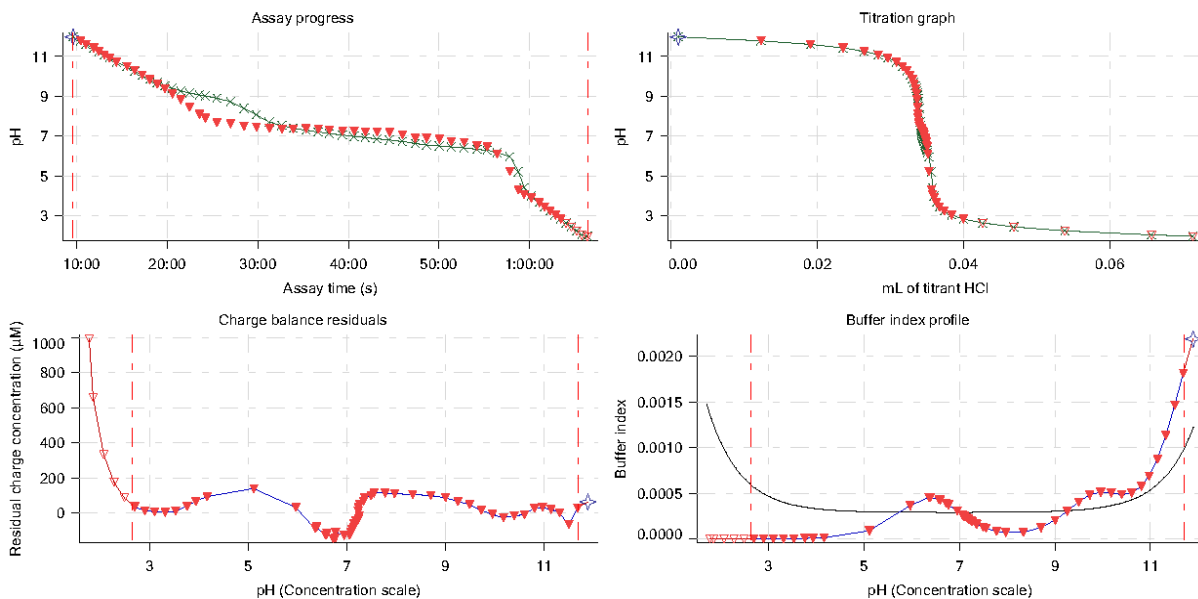

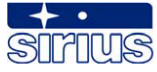

pH-metric

Sample name: KI-02308  
Assay name: pH-metric medium logP  
Assay ID: 16L-12007  
Filename: D:\Data\Customer\16L-12007\_KI-02308\_pH-metric medium logP.t3r

Experiment start time: 12/12/2016 10:21:00  
Analyst: KRICT  
Instrument ID: T313101

Other graphs (continued)

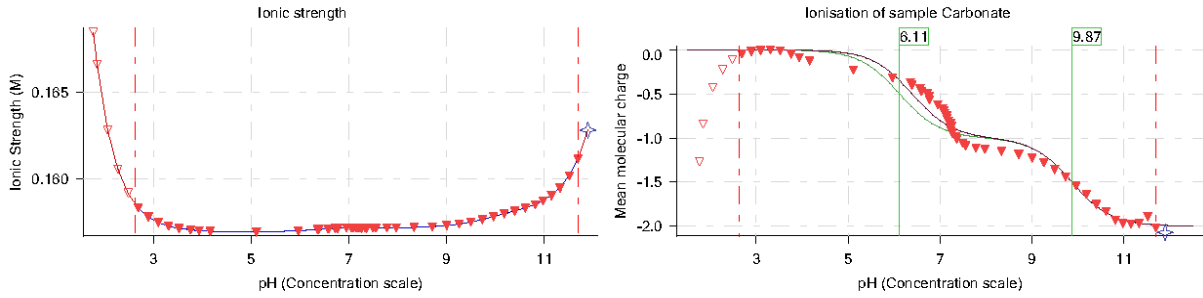

# pH-metric Log P of compound 9



pH-metric

Sample name: KI-2312  
Assay name: pH-metric medium logP  
Assay ID: 22F-01007  
Filename: D:\data\customer\22F-01007\_KI-2312\_pH-metric medium logP.t3r  
Experiment start time: 6/1/2022 6:45:06 AM  
Analyst:  
Instrument ID: T313101

## Overall results

RMSD 0.411  
Average ionic strength 0.159 M  
Average temperature 25.0°C  
Partition ratio 0.2756 : 1  
Analyte concentration range 1596.3 µM to 1687.4 µM  
Total points considered 33 of 47

## Warnings and errors

Errors None  
Warnings Sample concentration factor out of range

## Four-Plus parameters

Alpha 0.182 6/1/2022 6:45:06 AM D:\data\customer\22E-31003\_Blank standardisation.t3r  
S 0.9913 6/1/2022 6:45:06 AM D:\data\customer\22E-31003\_Blank standardisation.t3r  
jH 0.3 6/1/2022 6:45:06 AM D:\data\customer\22E-31003\_Blank standardisation.t3r  
jOH -0.5 6/1/2022 6:45:06 AM D:\data\customer\22E-31003\_Blank standardisation.t3r

## Titrants

0.50 M HCl 0.990757 6/1/2022 6:45:06 AM D:\data\customer\22E-31010\_Blank standardisation.t3r  
0.50 M KOH 1.009850 6/1/2022 6:45:06 AM D:\data\customer\21C-24006\_KHP\_Base standardisation using KHP.t3r

## Sample

KI-2312 concentration factor 806.884  
Acid pKa 1 12.20  
logP (neutral XH) 4.01  
logP (X-) 2.68

## Sample graphs

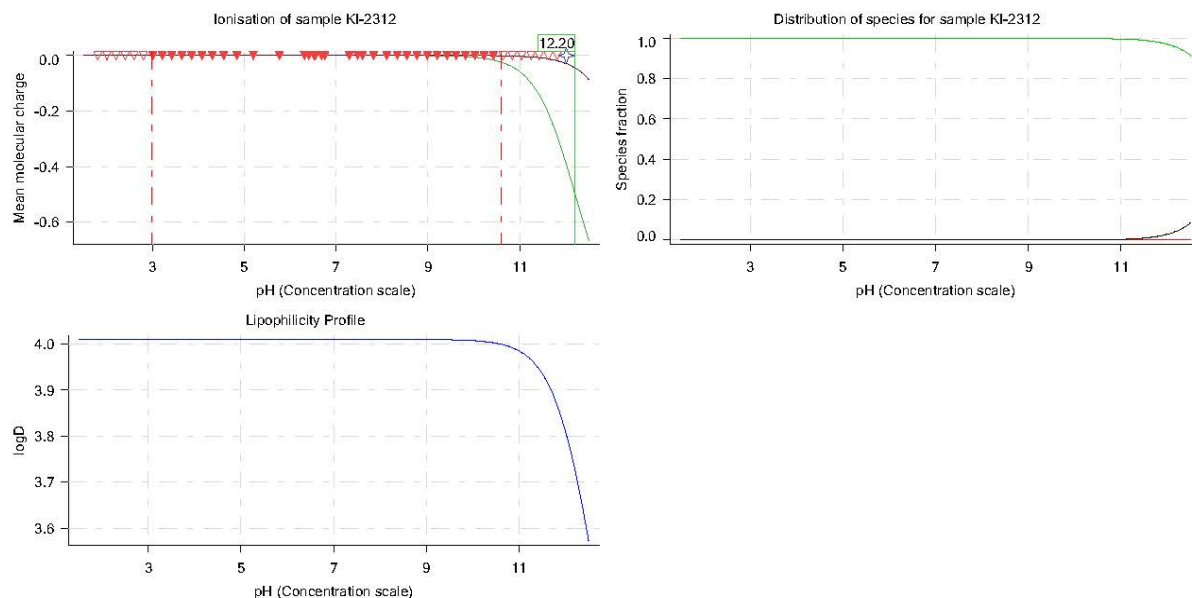

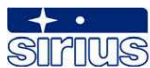

pH-metric

Sample name: KI-2312 Experiment start time: 6/1/2022 6:45:06 AM  
Assay name: pH-metric medium logP Analyst:  
Assay ID: 22F-01007 Instrument ID: T313101  
Filename: D:\data\customer\22F-01007\_KI-2312\_pH-metric medium logP.t3r

### Sample logD and percent species

| pH     | KI-2312 logD | KI-2312 KI-2312H | KI-2312 KI-2312 | KI-2312 KI-2312H* | KI-2312 KI-2312* | Comment    |
|--------|--------------|------------------|-----------------|-------------------|------------------|------------|
| 1.000  | 4.01         | 0.04 %           | 0.00 %          | 99.96 %           | 0.00 %           |            |
| 1.200  | 4.01         | 0.04 %           | 0.00 %          | 99.96 %           | 0.00 %           | Stomach pH |
| 2.000  | 4.01         | 0.04 %           | 0.00 %          | 99.96 %           | 0.00 %           |            |
| 3.000  | 4.01         | 0.04 %           | 0.00 %          | 99.96 %           | 0.00 %           |            |
| 4.000  | 4.01         | 0.04 %           | 0.00 %          | 99.96 %           | 0.00 %           |            |
| 5.000  | 4.01         | 0.04 %           | 0.00 %          | 99.96 %           | 0.00 %           |            |
| 6.000  | 4.01         | 0.04 %           | 0.00 %          | 99.96 %           | 0.00 %           |            |
| 6.500  | 4.01         | 0.04 %           | 0.00 %          | 99.96 %           | 0.00 %           |            |
| 7.000  | 4.01         | 0.04 %           | 0.00 %          | 99.96 %           | 0.00 %           |            |
| 7.400  | 4.01         | 0.04 %           | 0.00 %          | 99.96 %           | 0.00 %           | Blood pH   |
| 8.000  | 4.01         | 0.04 %           | 0.00 %          | 99.96 %           | 0.00 %           |            |
| 9.000  | 4.01         | 0.04 %           | 0.00 %          | 99.96 %           | 0.00 %           |            |
| 10.000 | 4.01         | 0.04 %           | 0.00 %          | 99.93 %           | 0.03 %           |            |
| 11.000 | 3.98         | 0.04 %           | 0.00 %          | 99.67 %           | 0.29 %           |            |
| 12.000 | 3.81         | 0.03 %           | 0.02 %          | 97.08 %           | 2.86 %           |            |

### Carbonate and acidity

Carbonate 0.500 mM  
Acidity error 2.525 mM

### Other graphs

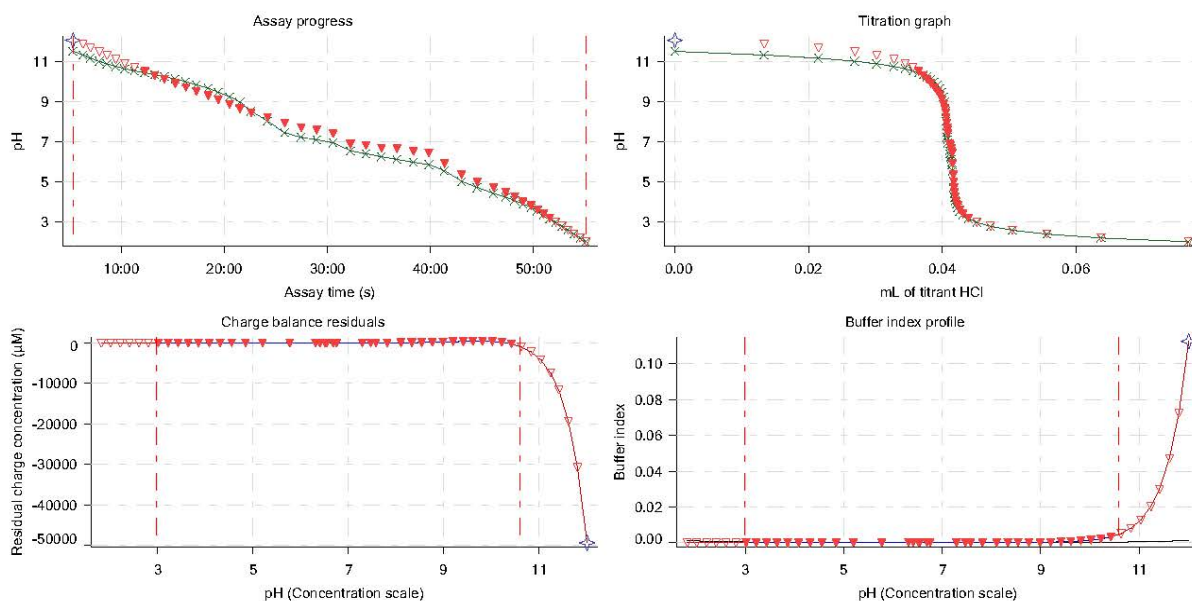

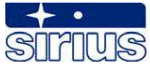

pH-metric

Sample name: KI-2312  
Assay name: pH-metric medium logP  
Assay ID: 22F-01007  
Filename: D:\data\customer\22F-01007\_KI-2312\_pH-metric medium logP.t3r

Experiment start time: 6/1/2022 6:45:06 AM  
Analyst:  
Instrument ID: T313101

Other graphs (continued)

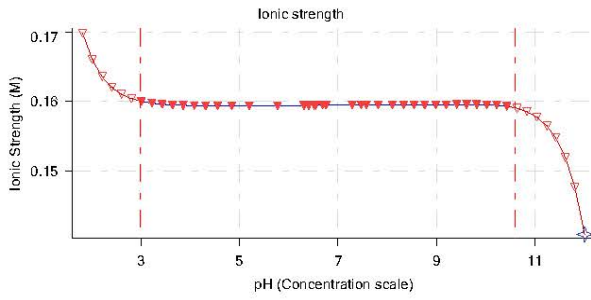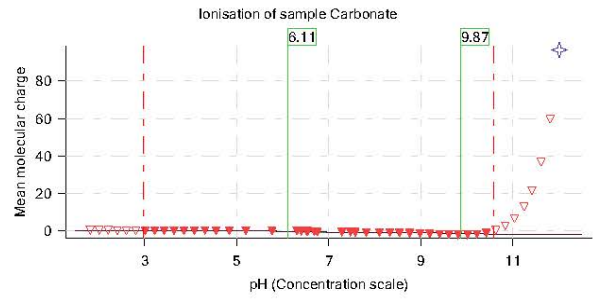

Supplement: d2ra06988a1.pdf [file d2ra06988a1.pdf]
